# Supplementary material for: Construction of the Six-lncRNA Prognosis Signature as a Novel Biomarker in Esophageal Squamous Cell Carcinoma
Source: Front Genet. 2022 Mar 31;13:839589. doi: 10.3389/fgene.2022.839589 (PMC9008717; doi:10.3389/fgene.2022.839589)
Supplement: Supplementary file 1 [file Table2.XLSX]

## Sheet: Sheet2
Supplementary table S2: The 127 signatures comprising different lncRNAs in the GSE53624 datasets (n=119)
multi-lncRNA-signature	Training_AUC	Training_KM-P	Training_COX_xishu	Training_COX_P	lncRNA Number
ENSG00000226352_ENSG00000231742_ENSG00000233461_ENSG00000250284_ENSG00000275226_ENSG00000276855	0.862716	2.28907e-10	1.52251	5.63486e-09	6
ENSG00000204706_ENSG00000226352_ENSG00000231742_ENSG00000233461_ENSG00000250284_ENSG00000275226_ENSG00000276855	0.855271	1.68339e-12	1.71852	1.96623e-10	7
ENSG00000226352_ENSG00000231742_ENSG00000233461_ENSG00000250284_ENSG00000276855	0.850208	1.754e-09	1.44562	2.50173e-08	5
ENSG00000204706_ENSG00000226352_ENSG00000231742_ENSG00000233461_ENSG00000250284_ENSG00000275226	0.848422	1.98069e-11	1.61853	9.77486e-10	6
ENSG00000226352_ENSG00000231742_ENSG00000233461_ENSG00000275226_ENSG00000276855	0.840977	9.91095e-12	1.63732	6.00498e-10	5
ENSG00000226352_ENSG00000233461_ENSG00000250284_ENSG00000275226_ENSG00000276855	0.840381	1.1603e-08	1.36204	1.03521e-07	5
ENSG00000226352_ENSG00000231742_ENSG00000233461_ENSG00000250284_ENSG00000275226	0.83919	3.45799e-07	1.21313	1.46393e-06	5
ENSG00000204706_ENSG00000226352_ENSG00000231742_ENSG00000233461_ENSG00000250284_ENSG00000276855	0.837999	3.80467e-11	1.59911	1.51337e-09	6
ENSG00000204706_ENSG00000226352_ENSG00000231742_ENSG00000233461_ENSG00000275226_ENSG00000276855	0.835616	1.35513e-13	1.78748	3.32047e-11	6
ENSG00000204706_ENSG00000231742_ENSG00000233461_ENSG00000250284_ENSG00000275226_ENSG00000276855	0.835616	1.24112e-09	1.46031	1.93451e-08	6
ENSG00000204706_ENSG00000231742_ENSG00000233461_ENSG00000250284_ENSG00000275226	0.834127	1.45698e-08	1.35878	1.18179e-07	5
ENSG00000204706_ENSG00000226352_ENSG00000231742_ENSG00000233461_ENSG00000275226	0.83383	1.06573e-10	1.54667	3.02376e-09	5
ENSG00000231742_ENSG00000233461_ENSG00000250284_ENSG00000275226_ENSG00000276855	0.832341	1.16661e-09	1.46786	1.88663e-08	5
ENSG00000204706_ENSG00000226352_ENSG00000233461_ENSG00000250284_ENSG00000275226_ENSG00000276855	0.832043	2.66898e-10	1.5133	6.11621e-09	6
ENSG00000226352_ENSG00000231742_ENSG00000233461_ENSG00000250284	0.830256	1.72863e-09	1.44254	2.49246e-08	4
ENSG00000226352_ENSG00000233461_ENSG00000250284_ENSG00000276855	0.829958	9.93106e-12	1.64021	5.81726e-10	4
ENSG00000226352_ENSG00000231742_ENSG00000233461_ENSG00000275226	0.829363	3.35278e-08	1.3221	2.31635e-07	4
ENSG00000226352_ENSG00000231742_ENSG00000233461_ENSG00000276855	0.8243	2.85546e-09	1.41717	3.38965e-08	4
ENSG00000204706_ENSG00000226352_ENSG00000231742_ENSG00000233461_ENSG00000250284	0.824002	9.32177e-10	1.4698	1.53081e-08	5
ENSG00000204706_ENSG00000226352_ENSG00000233461_ENSG00000250284_ENSG00000275226	0.824002	1.87417e-09	1.42826	2.47791e-08	5
ENSG00000226352_ENSG00000231742_ENSG00000250284_ENSG00000275226_ENSG00000276855	0.821918	1.45609e-07	1.23824	7.05014e-07	5
ENSG00000204706_ENSG00000226352_ENSG00000231742_ENSG00000250284_ENSG00000275226_ENSG00000276855	0.821322	9.10633e-09	1.36125	8.30369e-08	6
ENSG00000226352_ENSG00000233461_ENSG00000250284_ENSG00000275226	0.821024	1.19275e-09	1.45458	1.91014e-08	4
ENSG00000204706_ENSG00000233461_ENSG00000250284_ENSG00000275226_ENSG00000276855	0.820727	1.81198e-07	1.24453	8.63775e-07	5
ENSG00000233461_ENSG00000250284_ENSG00000275226_ENSG00000276855	0.818046	1.80017e-07	1.24386	8.66189e-07	4
ENSG00000231742_ENSG00000233461_ENSG00000250284_ENSG00000275226	0.816557	8.83868e-06	1.05091	2.06645e-05	4
ENSG00000204706_ENSG00000231742_ENSG00000233461_ENSG00000275226_ENSG00000276855	0.815962	6.40218e-08	1.28994	3.69779e-07	5
ENSG00000204706_ENSG00000231742_ENSG00000233461_ENSG00000275226	0.815366	1.60166e-07	1.25224	7.6955e-07	4
ENSG00000204706_ENSG00000226352_ENSG00000231742_ENSG00000233461_ENSG00000276855	0.814473	3.25887e-11	1.60906	1.3186e-09	5
ENSG00000204706_ENSG00000226352_ENSG00000233461_ENSG00000250284_ENSG00000276855	0.813877	5.39373e-10	1.49296	1.00234e-08	5
ENSG00000226352_ENSG00000233461_ENSG00000275226_ENSG00000276855	0.811793	2.98902e-09	1.4134	3.6039e-08	4
ENSG00000204706_ENSG00000226352_ENSG00000233461_ENSG00000275226_ENSG00000276855	0.811495	4.7287e-09	1.39359	5.12204e-08	5
ENSG00000226352_ENSG00000231742_ENSG00000250284_ENSG00000276855	0.811495	1.05622e-05	1.03423	2.37608e-05	4
ENSG00000204706_ENSG00000233461_ENSG00000250284_ENSG00000275226	0.810602	7.7624e-08	1.28093	4.30479e-07	4
ENSG00000226352_ENSG00000231742_ENSG00000275226_ENSG00000276855	0.810006	1.83574e-09	1.43231	2.44705e-08	4
ENSG00000204706_ENSG00000231742_ENSG00000233461_ENSG00000250284_ENSG00000276855	0.80673	1.37635e-08	1.36402	1.1171e-07	5
ENSG00000226352_ENSG00000231742_ENSG00000233461	0.805837	8.17106e-09	1.37811	7.64992e-08	3
ENSG00000204706_ENSG00000226352_ENSG00000231742_ENSG00000275226_ENSG00000276855	0.804943	1.67674e-11	1.61098	8.09455e-10	5
ENSG00000204706_ENSG00000226352_ENSG00000233461_ENSG00000275226	0.804943	6.7694e-11	1.56749	2.10023e-09	4
ENSG00000204706_ENSG00000226352_ENSG00000231742_ENSG00000250284_ENSG00000276855	0.804646	5.64963e-07	1.18602	2.11877e-06	5
ENSG00000204706_ENSG00000226352_ENSG00000231742_ENSG00000233461	0.803157	6.63048e-11	1.5767	2.33499e-09	4
ENSG00000231742_ENSG00000233461_ENSG00000275226_ENSG00000276855	0.802859	3.53663e-06	1.10569	9.72343e-06	4
ENSG00000204706_ENSG00000231742_ENSG00000250284_ENSG00000275226_ENSG00000276855	0.802263	4.91968e-09	1.3926	5.23869e-08	5
ENSG00000226352_ENSG00000233461_ENSG00000275226	0.80137	5.8006e-09	1.39433	5.78251e-08	3
ENSG00000204706_ENSG00000226352_ENSG00000231742_ENSG00000250284_ENSG00000275226	0.80137	1.62274e-07	1.23362	7.70069e-07	5
ENSG00000231742_ENSG00000233461_ENSG00000250284_ENSG00000276855	0.799881	6.68604e-07	1.18975	2.45562e-06	4
ENSG00000231742_ENSG00000250284_ENSG00000275226_ENSG00000276855	0.798987	2.06972e-06	1.12617	6.17421e-06	4
ENSG00000226352_ENSG00000250284_ENSG00000275226_ENSG00000276855	0.798094	1.22284e-08	1.34673	1.02752e-07	4
ENSG00000233461_ENSG00000250284_ENSG00000275226	0.797499	1.1367e-06	1.15668	3.72884e-06	3
ENSG00000204706_ENSG00000226352_ENSG00000233461_ENSG00000250284	0.795712	4.51311e-09	1.40008	4.78823e-08	4
ENSG00000226352_ENSG00000233461_ENSG00000276855	0.795116	3.71291e-09	1.40894	4.0978e-08	3
ENSG00000204706_ENSG00000226352_ENSG00000250284_ENSG00000275226_ENSG00000276855	0.793329	1.65392e-08	1.33848	1.28481e-07	5
ENSG00000204706_ENSG00000233461_ENSG00000275226	0.793329	2.30833e-08	1.34441	1.71738e-07	3
ENSG00000204706_ENSG00000226352_ENSG00000231742_ENSG00000275226	0.793032	2.23552e-10	1.52473	5.48703e-09	4
ENSG00000226352_ENSG00000233461_ENSG00000250284	0.792734	2.40002e-08	1.33513	1.7808e-07	3
ENSG00000226352_ENSG00000231742_ENSG00000276855	0.79184	1.31582e-07	1.24252	6.45447e-07	3
ENSG00000204706_ENSG00000226352_ENSG00000231742_ENSG00000276855	0.789458	5.01213e-09	1.39312	5.27679e-08	4
ENSG00000204706_ENSG00000231742_ENSG00000233461_ENSG00000250284	0.788565	2.47408e-09	1.44162	3.12401e-08	4
ENSG00000204706_ENSG00000233461_ENSG00000275226_ENSG00000276855	0.788267	1.51355e-07	1.25523	7.42482e-07	4
ENSG00000204706_ENSG00000231742_ENSG00000275226_ENSG00000276855	0.787373	1.31901e-10	1.53989	3.48882e-09	4
ENSG00000204706_ENSG00000226352_ENSG00000233461_ENSG00000276855	0.786182	3.81189e-09	1.40829	4.15484e-08	4
ENSG00000226352_ENSG00000231742_ENSG00000250284_ENSG00000275226	0.786182	2.00912e-07	1.233	9.46754e-07	4
ENSG00000204706_ENSG00000231742_ENSG00000250284_ENSG00000275226	0.785587	9.96939e-08	1.26434	5.34317e-07	4
ENSG00000204706_ENSG00000233461_ENSG00000250284_ENSG00000276855	0.784693	6.32952e-07	1.18139	2.30339e-06	4
ENSG00000231742_ENSG00000233461_ENSG00000275226	0.784693	8.40432e-06	1.06778	2.00483e-05	3
ENSG00000204706_ENSG00000226352_ENSG00000231742_ENSG00000250284	0.783502	1.48362e-07	1.24977	7.30483e-07	4
ENSG00000226352_ENSG00000250284_ENSG00000276855	0.777844	0.000122894	0.902025	0.000199023	3
ENSG00000204706_ENSG00000226352_ENSG00000275226_ENSG00000276855	0.777546	1.117e-07	1.24887	5.69725e-07	4
ENSG00000204706_ENSG00000226352_ENSG00000250284_ENSG00000275226	0.776653	3.45016e-06	1.09357	9.35342e-06	4
ENSG00000204706_ENSG00000231742_ENSG00000275226	0.776057	1.27836e-08	1.35724	1.09242e-07	3
ENSG00000204706_ENSG00000231742_ENSG00000233461_ENSG00000276855	0.776057	1.71382e-08	1.36115	1.30012e-07	4
ENSG00000226352_ENSG00000231742_ENSG00000275226	0.775759	1.95666e-06	1.126	5.95762e-06	3
ENSG00000204706_ENSG00000231742_ENSG00000250284_ENSG00000276855	0.774568	4.8879e-06	1.07992	1.24566e-05	4
ENSG00000204706_ENSG00000250284_ENSG00000275226_ENSG00000276855	0.77427	2.70717e-06	1.10602	7.59643e-06	4
ENSG00000233461_ENSG00000275226_ENSG00000276855	0.772186	9.6665e-06	1.04762	2.25056e-05	3
ENSG00000204706_ENSG00000226352_ENSG00000250284_ENSG00000276855	0.77159	3.3322e-07	1.20554	1.37495e-06	4
ENSG00000231742_ENSG00000275226_ENSG00000276855	0.770399	1.00176e-08	1.37596	8.86691e-08	3
ENSG00000233461_ENSG00000250284_ENSG00000276855	0.770101	9.59259e-06	1.04859	2.2079e-05	3
ENSG00000204706_ENSG00000226352_ENSG00000233461	0.769506	1.48757e-08	1.35933	1.19642e-07	3
ENSG00000226352_ENSG00000231742_ENSG00000250284	0.769208	6.58726e-06	1.06022	1.6198e-05	3
ENSG00000233461_ENSG00000275226	0.769208	1.31664e-05	1.03366	2.9034e-05	2
ENSG00000226352_ENSG00000233461	0.768017	1.35624e-10	1.54465	3.54067e-09	2
ENSG00000226352_ENSG00000275226_ENSG00000276855	0.768017	2.13407e-07	1.22206	9.6771e-07	3
ENSG00000204706_ENSG00000226352_ENSG00000231742	0.767421	4.07564e-08	1.30073	2.62091e-07	3
ENSG00000204706_ENSG00000233461_ENSG00000250284	0.767421	2.33082e-06	1.12513	6.73567e-06	3
ENSG00000250284_ENSG00000275226_ENSG00000276855	0.766528	0.000233417	0.865799	0.000353106	3
ENSG00000231742_ENSG00000233461_ENSG00000250284	0.76623	0.000401764	0.840608	0.000577958	3
ENSG00000231742_ENSG00000250284_ENSG00000276855	0.763848	0.000196082	0.884044	0.000304276	3
ENSG00000204706_ENSG00000226352_ENSG00000275226	0.761167	2.91377e-07	1.21357	1.22177e-06	3
ENSG00000226352_ENSG00000250284_ENSG00000275226	0.757594	8.82014e-06	1.04551	2.08936e-05	3
ENSG00000204706_ENSG00000250284_ENSG00000275226	0.757296	0.000166417	0.886385	0.00026057	3
ENSG00000231742_ENSG00000250284_ENSG00000275226	0.756105	3.20375e-06	1.10465	8.96723e-06	3
ENSG00000204706_ENSG00000231742_ENSG00000233461	0.755509	2.79951e-06	1.11846	7.81032e-06	3
ENSG00000231742_ENSG00000233461_ENSG00000276855	0.755211	2.19983e-05	1.0226	4.5396e-05	3
ENSG00000204706_ENSG00000231742_ENSG00000250284	0.754914	5.92173e-08	1.29314	3.43106e-07	3
ENSG00000204706_ENSG00000233461_ENSG00000276855	0.752233	6.62509e-07	1.1915	2.42647e-06	3
ENSG00000226352_ENSG00000231742	0.751936	1.22281e-05	1.03064	2.75563e-05	2
ENSG00000204706_ENSG00000275226_ENSG00000276855	0.748958	2.51673e-06	1.10779	7.17736e-06	3
ENSG00000204706_ENSG00000226352_ENSG00000250284	0.746873	2.99871e-05	0.982903	5.82255e-05	3
ENSG00000204706_ENSG00000226352_ENSG00000276855	0.744789	1.57041e-06	1.12989	4.80364e-06	3
ENSG00000233461_ENSG00000250284	0.743597	0.000131463	0.905496	0.000212999	2
ENSG00000231742_ENSG00000275226	0.7433	3.2808e-06	1.10578	9.08311e-06	2
ENSG00000204706_ENSG00000231742_ENSG00000276855	0.742704	2.83825e-06	1.1152	7.97187e-06	3
ENSG00000204706_ENSG00000275226	0.740619	5.06941e-06	1.07577	1.28999e-05	2
ENSG00000204706_ENSG00000250284_ENSG00000276855	0.738833	0.000305121	0.850081	0.00044838	3
ENSG00000226352_ENSG00000276855	0.737344	1.09568e-05	1.03274	2.44205e-05	2
ENSG00000204706_ENSG00000233461	0.733175	4.65348e-07	1.20996	1.79993e-06	2
ENSG00000226352_ENSG00000275226	0.728708	8.75862e-05	0.919088	0.000148379	2
ENSG00000250284_ENSG00000276855	0.72573	0.000437925	0.829611	0.000623065	2
ENSG00000275226_ENSG00000276855	0.722752	0.000162803	0.885807	0.000258362	2
ENSG00000226352_ENSG00000250284	0.722156	0.00159918	0.741712	0.00201926	2
ENSG00000204706_ENSG00000231742	0.720369	3.49351e-06	1.0987	9.27095e-06	2
ENSG00000204706_ENSG00000226352	0.720369	3.02899e-05	0.984517	5.84696e-05	2
ENSG00000233461_ENSG00000276855	0.720071	0.00551629	0.656692	0.00636572	2
ENSG00000250284_ENSG00000275226	0.718285	0.000206869	0.875476	0.000322385	2
ENSG00000204706_ENSG00000250284	0.717987	7.90883e-05	0.927026	0.000134603	2
ENSG00000231742_ENSG00000276855	0.717391	0.00148945	0.751548	0.00189649	2
ENSG00000231742_ENSG00000233461	0.713818	0.0150628	0.573029	0.0164252	2
ENSG00000231742_ENSG00000250284	0.70399	0.0122817	0.589091	0.0134905	2
ENSG00000204706_ENSG00000276855	0.700119	0.000267614	0.8578	0.000398553	2
ENSG00000233461	0.692674	0.00112036	0.771982	0.001458	1
ENSG00000204706	0.691483	0.000388422	0.831095	0.000553725	1
ENSG00000226352	0.683145	0.000676065	0.798359	0.000917606	1
ENSG00000275226	0.667362	0.0202406	0.544968	0.0218219	1
ENSG00000250284	0.641453	0.00188027	0.736501	0.00233993	1
ENSG00000231742	0.639369	0.00673553	0.636921	0.00764691	1
ENSG00000276855	0.636391	0.00584729	0.648035	0.00671515	1
