# Supplementary material for: Construction of the Six-lncRNA Prognosis Signature as a Novel Biomarker in Esophageal Squamous Cell Carcinoma
Source: Front Genet. 2022 Mar 31;13:839589. doi: 10.3389/fgene.2022.839589 (PMC9008717; doi:10.3389/fgene.2022.839589)
Supplement: Supplementary file 2 [file Table3.XLSX]

## Sheet: Sheet1
Supplementary table S3. Functional enrichment analysis of the six lncRNAs by Cluego and SubpathwayMiner.
GOID	GOTerm	pvalue	FDR	Associated Genes Found	All Associated Genes	Method
GO:0000313	organellar ribosome	8.4784e-07	0.000375593	[CHCHD1, MRPL13, MRPL14, MRPL15, MRPL20, MRPL24, MRPL27, MRPL41, MRPL52, MRPL54, MRPL55, MRPL58]	[CHCHD1, DAP3, DLGAP3, GADD45GIP1, LEXM, MPV17L2, MRPL10, MRPL11, MRPL12, MRPL13, MRPL14, MRPL15, MRPL16, MRPL17, MRPL18, MRPL19, MRPL2, MRPL20, MRPL21, MRPL22, MRPL23, MRPL24, MRPL27, MRPL28, MRPL3, MRPL30, MRPL32, MRPL33, MRPL34, MRPL35, MRPL36, MRPL37, MRPL38, MRPL39, MRPL4, MRPL40, MRPL41, MRPL42, MRPL43, MRPL44, MRPL45, MRPL46, MRPL47, MRPL48, MRPL49, MRPL50, MRPL51, MRPL52, MRPL53, MRPL54, …	Cluego
GO:0000315	organellar large ribosomal subunit	2.69299e-08	1.21992e-05	[MRPL13, MRPL14, MRPL15, MRPL20, MRPL24, MRPL27, MRPL41, MRPL52, MRPL54, MRPL55, MRPL58]	[MPV17L2, MRPL10, MRPL11, MRPL12, MRPL13, MRPL14, MRPL15, MRPL16, MRPL17, MRPL18, MRPL19, MRPL2, MRPL20, MRPL21, MRPL22, MRPL23, MRPL24, MRPL27, MRPL28, MRPL3, MRPL30, MRPL32, MRPL33, MRPL34, MRPL35, MRPL36, MRPL37, MRPL38, MRPL39, MRPL4, MRPL40, MRPL41, MRPL42, MRPL43, MRPL44, MRPL45, MRPL46, MRPL47, MRPL48, MRPL49, MRPL50, MRPL51, MRPL52, MRPL53, MRPL54, MRPL55, MRPL58, MRPL9, MTERF4, NSUN3, NS…	Cluego
GO:0000462	maturation of SSU-rRNA from tricistronic rRNA transcript (SSU-rRNA, 5.8S rRNA, LSU-rRNA)	2.4086e-05	0.0104052	[BYSL, KRR1, NOC4L, RPS14, RRP36, RRS1, UTP3]	[ABT1, BMS1, BYSL, DCAF13, DIEXF, EMG1, FCF1, HEATR1, KRI1, KRR1, LOC102724159, MRPS11, MRPS9, NGDN, NOC4L, NOP14, PWP2, RCL1, RPS14, RPS16, RPS19, RPS21, RPS24, RPS8, RPSA, RRP36, RRS1, TBL3, TSR1, TSR2, UTP18, UTP20, UTP23, UTP3, UTP6, WDR3, WDR46]	Cluego
GO:0001522	pseudouridine synthesis	8.93679e-05	0.0378026	[CNGB1, NOP10, PUS1, PUSL1, TRUB2]	[CNGB1, DKC1, GAR1, MRPL1, NAF1, NHP2, NOP10, PUS1, PUS10, PUS3, PUS7, PUS7L, PUSL1, RPUSD1, RPUSD2, RPUSD3, RPUSD4, TNIP1, TRUB1, TRUB2]	Cluego
GO:0003723	RNA binding	5.81276e-07	0.000258668	[ALDOA, ALYREF, BYSL, CACTIN, CCDC124, CCDC137, CDK9, CHCHD1, CNGB1, CNOT4, CSNK1E, DAZAP1, DDX17, DDX28, DDX39A, DDX49, EDF1, EIF1, EIF2B3, EIF2S1, EIF4E, ELOC, ELOF1, EXOSC4, GATB, KRR1, LONP1, LSM7, MAGOHB, MANF, MATR3, MBNL3, METTL1, MEX3D, MRPL13, MRPL14, MRPL15, MRPL20, MRPL27, MRPL41, MRPL54, MRPL58, MRTO4, NME1, NOC4L, NOP10, NOP16, PCBP4, PEF1, POP4, PRPF31, PTRH1, PUS1, PUSL1, PYDC1, PY…	[A1CF, AARS, AARS2, AATF, ABCF1, ABT1, ABTB1, ACAA2, ACIN1, ACO1, ACTN1, ACTN4, ADAD1, ADAD2, ADAR, ADARB1, ADARB2, ADAT1, ADD1, ADK, AFF2, AGFG1, AGO1, AGO2, AGO3, AGO4, AHCYL1, AHNAK, AIMP1, AK8, AKAP1, AKAP17A, AKAP8, AKAP8L, ALDH18A1, ALDH6A1, ALDOA, ALG13, ALKBH1, ALKBH5, ALKBH8, ALYREF, ANG, ANGEL2, ANKHD1, ANKRD17, ANP32A, ANXA1, ANXA11, ANXA2, ANXA7, APEH, APEX1, API5, APOBEC1, APOBEC2, A…	Cluego
GO:0005654	nucleoplasm	1.77758e-10	8.12355e-08	[ACOT7, ADPRHL2, AHCTF1, ALYREF, ANAPC11, AP5S1, APRT, ASCC2, AURKAIP1, BABAM1, BCAS2, BRMS1, BYSL, C19orf70, C2orf49, CACTIN, CBFA2T3, CDC73, CDK7, CDK9, CDKN2D, CEBPD, CFAP45, CHCHD1, CNGB1, COG5, COPS3, CSNK1E, DAXX, DAZAP1, DCAF8, DDX17, DDX39A, DDX49, DNLZ, DPEP3, DPP3, EDF1, EIF4E, ELF2, ELK4, ELOC, ELOF1, EXOSC4, FAM96B, FANCE, GEMIN7, HCK, HES5, IP6K1, ISG15, JARID2, KMT5C, KRR1, LONP1, L…	[A1CF, AAAS, AAGAB, ABCA6, ABCB4, ABCB6, ABCF1, ABL1, ACADM, ACADS, ACBD5, ACD, ACIN1, ACKR2, ACKR4, ACLY, ACOD1, ACOT7, ACOX1, ACSS2, ACTB, ACTL6A, ACTN4, ACTR5, ACTR8, ADAM12, ADAMTS4, ADAR, ADARB1, ADAT2, ADAT3, ADD1, ADD3, ADH1A, ADH1B, ADH1C, ADIRF, ADK, ADPRHL2, ADRM1, AEBP2, AEN, AFDN, AFF1, AFF2, AFF3, AFF4, AFM, AFTPH, AGO1, AGO2, AGO3, AGO4, AGTRAP, AHCTF1, AHR, AHRR, AIM2, AIP, AIRE, A…	Cluego
GO:0005655	nucleolar ribonuclease P complex	6.11456e-05	0.0259257	[POP4, POP5, PYDC1, RPP40]	[BVES, NLRP2B, POP1, POP4, POP5, POP7, PYDC1, RPP30, RPP38, RPP40]	Cluego
GO:0005739	mitochondrion	1.30852e-09	5.96687e-07	[ACOT7, ADPRHL2, AURKAIP1, C19orf70, CCDC51, CCM2, CHCHD1, CHCHD5, CLIC1, CLPP, CMC1, COASY, COMTD1, COQ4, COX14, CPOX, DCAF8, DDX28, DNLZ, EMC8, ENDOG, ETFDH, FLAD1, FTMT, GATB, GLRX5, HOOK2, JARID2, LONP1, MIEF2, MPG, MPST, MRPL13, MRPL14, MRPL15, MRPL20, MRPL24, MRPL27, MRPL41, MRPL52, MRPL54, MRPL55, MRPL58, NAIF1, NDUFA12, NDUFAB1, NDUFAF8, NDUFB1, NDUFB7, NUDT2, OTC, PDHB, PDPR, PFDN2, POLD…	[AADAT, AARS2, AASS, ABAT, ABCA12, ABCA8, ABCA9, ABCB10, ABCB6, ABCB7, ABCB8, ABCC12, ABCD1, ABCD3, ABCE1, ABCF2, ABCG1, ABCG2, ABHD10, ABHD11, ABHD6, ABL1, ACAA2, ACACA, ACACB, ACAD10, ACAD11, ACAD8, ACAD9, ACADL, ACADM, ACADS, ACADSB, ACADVL, ACAT1, ACAT2, ACBD3, ACD, ACO1, ACO2, ACOD1, ACOT13, ACOT2, ACOT7, ACOT8, ACOT9, ACOX1, ACOX2, ACOX3, ACP6, ACSBG2, ACSF2, ACSF3, ACSL1, ACSL3, ACSL4, ACS…	Cluego
GO:0005740	mitochondrial envelope	6.55775e-07	0.000291164	[AURKAIP1, C19orf70, CHCHD1, CHCHD5, COASY, COQ4, COX14, CPOX, ETFDH, HOOK2, MIEF2, MRPL13, MRPL14, MRPL15, MRPL20, MRPL24, MRPL27, MRPL41, MRPL52, MRPL54, MRPL55, MRPL58, NDUFA12, NDUFAB1, NDUFB1, NDUFB7, OTC, ROMO1, SFI1, SLC25A17, SLC25A39, THOP1, TIMM10, TIMM8B, TIMM9, TMEM11, UBC, UCP3, UQCC3, UQCR11, UQCRC1, UQCRH]	[ABCA12, ABCA8, ABCB10, ABCB6, ABCB7, ABCB8, ABCD3, ABCF2, ABCG2, ACAA2, ACACB, ACAD11, ACAD9, ACADL, ACADVL, ACAT1, ACSL1, ACSL3, ACSL4, ACSL5, ACSL6, ADAP2, AFG3L2, AGK, AGPAT5, AIFM1, AIFM2, AIFM3, AK2, AKAP1, ALAS2, ALDH18A1, ALDH3A2, AMBRA1, ANKZF1, ANXA1, AOC1, APOO, APOOL, ARG1, ARL2, ARL2BP, ARMCX3, ATAD3A, ATAD3B, ATCAY, ATF2, ATP5A1, ATP5B, ATP5C1, ATP5D, ATP5E, ATP5EP2, ATP5F1, ATP5G1,…	Cluego
GO:0005743	mitochondrial inner membrane	2.61438e-08	1.18693e-05	[AURKAIP1, C19orf70, CHCHD1, COQ4, CPOX, ETFDH, MRPL13, MRPL14, MRPL15, MRPL20, MRPL24, MRPL27, MRPL41, MRPL52, MRPL54, MRPL55, MRPL58, NDUFA12, NDUFAB1, NDUFB1, NDUFB7, OTC, ROMO1, SFI1, SLC25A17, SLC25A39, TIMM10, TIMM8B, TIMM9, TMEM11, UCP3, UQCC3, UQCR11, UQCRC1, UQCRH]	[ABCA12, ABCA8, ABCB10, ABCB7, ABCB8, ABCD3, ACAA2, ACAD11, ACAD9, ACADVL, ACAT1, ACSL5, AFG3L2, AIFM1, AIFM3, AK2, ALAS2, ALDH18A1, ALDH3A2, APOO, APOOL, ATAD3A, ATAD3B, ATP5A1, ATP5B, ATP5C1, ATP5D, ATP5E, ATP5EP2, ATP5F1, ATP5G1, ATP5G2, ATP5G3, ATP5H, ATP5I, ATP5J, ATP5J2, ATP5L, ATP5L2, ATP5O, ATP5S, ATP6, ATP8, ATPIF1, AURKAIP1, AVPR2, BCL2L1, BCS1L, BDH1, BOK, C13055, C14orf2, C15orf48, C1…	Cluego
GO:0005759	mitochondrial matrix	9.69425e-07	0.000428486	[ADPRHL2, CHCHD1, CLPP, COASY, DDX28, ETFDH, FLAD1, GLRX5, LONP1, MPG, MRPL13, MRPL14, MRPL15, MRPL20, MRPL24, MRPL27, MRPL41, MRPL52, MRPL54, MRPL55, MRPL58, NDUFAB1, NUDT2, OTC, PDHB, PDPR, PUS1, SDHAF1, SUPV3L1, TXNRD2]	[AADAT, AASS, ABAT, ABCE1, ABHD10, ACAA2, ACAD10, ACAD8, ACADL, ACADM, ACADS, ACADSB, ACADVL, ACAT1, ACO2, ACOT2, ACOT9, ACP6, ACSF2, ACSF3, ACSM1, ACSM2A, ACSM2B, ACSM3, ACSM4, ACSM5, ACSM6, ACSS1, ACSS3, ADHFE1, ADPRHL2, AGXT, AGXT2, AK3, AK4, AKR1B15, ALAS1, ALAS2, ALDH1B1, ALDH1L2, ALDH2, ALDH4A1, ALDH5A1, ALDH6A1, ALDH7A1, ALKBH7, AMT, ARG2, ARL2, ARL2BP, ATAD3A, ATG4D, ATP5A1, ATP5B, ATP5C1…	Cluego
GO:0005761	mitochondrial ribosome	8.4784e-07	0.000375593	[CHCHD1, MRPL13, MRPL14, MRPL15, MRPL20, MRPL24, MRPL27, MRPL41, MRPL52, MRPL54, MRPL55, MRPL58]	[CHCHD1, DAP3, DLGAP3, GADD45GIP1, LEXM, MPV17L2, MRPL10, MRPL11, MRPL12, MRPL13, MRPL14, MRPL15, MRPL16, MRPL17, MRPL18, MRPL19, MRPL2, MRPL20, MRPL21, MRPL22, MRPL23, MRPL24, MRPL27, MRPL28, MRPL3, MRPL30, MRPL32, MRPL33, MRPL34, MRPL35, MRPL36, MRPL37, MRPL38, MRPL39, MRPL4, MRPL40, MRPL41, MRPL42, MRPL43, MRPL44, MRPL45, MRPL46, MRPL47, MRPL48, MRPL49, MRPL50, MRPL51, MRPL52, MRPL53, MRPL54, …	Cluego
GO:0005762	mitochondrial large ribosomal subunit	2.69299e-08	1.21992e-05	[MRPL13, MRPL14, MRPL15, MRPL20, MRPL24, MRPL27, MRPL41, MRPL52, MRPL54, MRPL55, MRPL58]	[MPV17L2, MRPL10, MRPL11, MRPL12, MRPL13, MRPL14, MRPL15, MRPL16, MRPL17, MRPL18, MRPL19, MRPL2, MRPL20, MRPL21, MRPL22, MRPL23, MRPL24, MRPL27, MRPL28, MRPL3, MRPL30, MRPL32, MRPL33, MRPL34, MRPL35, MRPL36, MRPL37, MRPL38, MRPL39, MRPL4, MRPL40, MRPL41, MRPL42, MRPL43, MRPL44, MRPL45, MRPL46, MRPL47, MRPL48, MRPL49, MRPL50, MRPL51, MRPL52, MRPL53, MRPL54, MRPL55, MRPL58, MRPL9, MTERF4, NSUN3, NS…	Cluego
GO:0006364	rRNA processing	3.92431e-05	0.0167961	[BYSL, CNGB1, CSNK1E, DDX49, EXOSC4, KRR1, MRPL13, MRTO4, NOC4L, NOP10, POP4, RPP40, RPS14, RRP36, RRP8, RRS1, UTP3, WDR18, WDR55]	[ABT1, BMS1, BMT2, BOP1, BUD23, BYSL, C1D, CDKN2A, CHD7, CNGB1, CSNK1D, CSNK1E, DCAF13, DDX21, DDX27, DDX47, DDX49, DDX51, DDX52, DDX56, DHX37, DIEXF, DIMT1, DIS3, DIS3L, DIS3L2, DKC1, EBNA1BP2, EIF4A3, EIF6, EMG1, ERI1, ERI2, ERI3, EXOSC1, EXOSC10, EXOSC2, EXOSC3, EXOSC4, EXOSC5, EXOSC6, EXOSC7, EXOSC8, EXOSC9, FAU, FBL, FBLL1, FCF1, FRG1, FTSJ3, GAR1, GEMIN4, GTF2H5, GTPBP4, HEATR1, IGF2BP3, IM…	Cluego
GO:0006396	RNA processing	8.44414e-08	3.79986e-05	[ALYREF, AURKAIP1, BCAS2, BYSL, C2orf49, CACTIN, CDC73, CDK7, CDK9, CNGB1, CSNK1E, DAZAP1, DDX17, DDX39A, DDX49, DEDD2, EXOSC4, FTSJ1, GEMIN7, KRR1, LSM7, MAGOHB, MBNL3, METTL1, MNAT1, MRPL13, MRTO4, NOC4L, NOP10, POP4, POP5, PRPF19, PRPF31, PUS1, PUSL1, PYDC1, RPP40, RPS14, RRP36, RRP8, RRS1, SF3B5, SMN2, SNRPD1, SUPV3L1, TARBP2, TRUB2, USB1, UTP3, WDR18, WDR55]	[A1CF, AAR2, AARS, AARS2, ABT1, ACIN1, ADAD1, ADAD2, ADAR, ADARB1, ADARB2, ADAT1, ADAT2, ADAT3, AFF2, AGO1, AGO2, AGO3, AGO4, AHCYL1, AHNAK, AICDA, AKAP17A, AKAP8L, ALKBH1, ALKBH5, ALKBH8, ALYREF, APOBEC1, APOBEC2, APOBEC4, APP, AQR, ARL6IP4, ATXN1, AURKAIP1, BARD1, BCAS2, BCDIN3D, BICD1, BMS1, BMT2, BOP1, BRDT, BUD13, BUD23, BUD31, BVES, BYSL, C14orf166, C1D, C1QBP, C2orf49, C9orf64, CACTIN, CAS…	Cluego
GO:0006414	translational elongation	3.96247e-06	0.00173556	[AURKAIP1, CHCHD1, ELOC, ELOF1, MRPL13, MRPL14, MRPL15, MRPL20, MRPL24, MRPL27, MRPL41, MRPL52, MRPL54, MRPL55, MRPL58]	[AARS, AARSD1, ABTB1, ALKBH1, AURKAIP1, CDK5RAP1, CHCHD1, CPEB2, CPEB3, DAP3, DIO2, DLGAP3, DTD1, DTD2, EEF1A1, EEF1A1P5, EEF1A2, EEF1B2, EEF1D, EEF1DP3, EEF1G, EEF2, EEF2K, EEFSEC, EFL1, EFNA1, EIF4A3, EIF5A, EIF5A2, EIF5AL1, ELOA, ELOA2, ELOB, ELOC, ELOF1, ERAL1, GADD45GIP1, GATC, GFM1, GFM2, HBS1L, IARS, IARS2, LARS, LARS2, MRPL1, MRPL10, MRPL11, MRPL12, MRPL13, MRPL14, MRPL15, MRPL16, MRPL17,…	Cluego
GO:0006415	translational termination	1.23699e-06	0.000544275	[AURKAIP1, CHCHD1, MRPL13, MRPL14, MRPL15, MRPL20, MRPL24, MRPL27, MRPL41, MRPL52, MRPL54, MRPL55, MRPL58]	[ABCE1, APEH, AURKAIP1, C12orf65, CHCHD1, DAP3, DLGAP3, EIF5A, EIF5A2, EIF5AL1, ERAL1, ETF1, GADD45GIP1, GFM2, GLE1, GSPT1, GSPT2, MRPL1, MRPL10, MRPL11, MRPL12, MRPL13, MRPL14, MRPL15, MRPL16, MRPL17, MRPL18, MRPL19, MRPL2, MRPL20, MRPL21, MRPL22, MRPL23, MRPL24, MRPL27, MRPL28, MRPL3, MRPL30, MRPL32, MRPL33, MRPL34, MRPL35, MRPL36, MRPL37, MRPL38, MRPL39, MRPL4, MRPL40, MRPL41, MRPL42, MRPL43, …	Cluego
GO:0010948	negative regulation of cell cycle process	1.27713e-05	0.00555552	[AURKAIP1, CCM2, CDC73, CDK9, CHMP2A, CNOT4, MDM4, MNAT1, PCBP4, PSMB3, PSMB5, PSMB6, PSMC6, PSMD12, PSMD3, RBX1, TNKS, TPRA1, UBC, WAPL, ZFYVE19]	[AMH, ANAPC15, APC, ARID3A, ARTN, ATF5, ATM, ATRX, AURKA, AURKAIP1, AURKB, BAX, BCL2, BCL6, BLM, BMP4, BMP7, BRCA1, BRD7, BTG2, BUB1, BUB1B, C10orf99, C16542, CALR, CARM1, CASP2, CCM2, CCNB1, CCND1, CCNF, CCNK, CDC25C, CDC73, CDK1, CDK2, CDK4, CDK5RAP2, CDK5RAP3, CDK9, CDKN1A, CDKN1B, CDKN2B, CDT1, CENPF, CENPJ, CFH, CHEK1, CHEK2, CHMP2A, CHMP4C, CLSPN, CNOT1, CNOT10, CNOT11, CNOT2, CNOT3, CNOT4,…	Cluego
GO:0016072	rRNA metabolic process	2.52566e-05	0.0108856	[BYSL, CNGB1, CSNK1E, DDX49, DEDD2, EXOSC4, KRR1, MRPL13, MRTO4, NOC4L, NOP10, POP4, RPP40, RPS14, RRP36, RRP8, RRS1, SIRT7, UTP3, WDR18, WDR55]	[ABT1, ANG, BMS1, BMT2, BOP1, BRF1, BUD23, BYSL, C1D, CD3EAP, CDKN2A, CHD7, CLN5, CNGB1, CSNK1D, CSNK1E, DCAF13, DDX11, DDX21, DDX27, DDX47, DDX49, DDX51, DDX52, DDX56, DEDD, DEDD2, DHX37, DIEXF, DIMT1, DIS3, DIS3L, DIS3L2, DKC1, DNAJC5, DROSHA, EBNA1BP2, EIF4A3, EIF6, EMG1, ERI1, ERI2, ERI3, ERN2, EXOSC1, EXOSC10, EXOSC2, EXOSC3, EXOSC4, EXOSC5, EXOSC6, EXOSC7, EXOSC8, EXOSC9, FAU, FBL, FBLL1, F…	Cluego
GO:0019866	organelle inner membrane	4.61019e-08	2.0792e-05	[AURKAIP1, C19orf70, CHCHD1, COQ4, CPOX, DPY19L3, ETFDH, MATR3, MRPL13, MRPL14, MRPL15, MRPL20, MRPL24, MRPL27, MRPL41, MRPL52, MRPL54, MRPL55, MRPL58, NDUFA12, NDUFAB1, NDUFB1, NDUFB7, OTC, ROMO1, SFI1, SLC25A17, SLC25A39, TIMM10, TIMM8B, TIMM9, TMEM11, UCP3, UQCC3, UQCR11, UQCRC1, UQCRH]	[ABCA12, ABCA8, ABCB10, ABCB7, ABCB8, ABCD3, ACAA2, ACAD11, ACAD9, ACADVL, ACAT1, ACSL5, AFG3L2, AIFM1, AIFM3, AK2, ALAS2, ALDH18A1, ALDH3A2, ANKLE1, APOO, APOOL, ATAD3A, ATAD3B, ATP11B, ATP1B4, ATP5A1, ATP5B, ATP5C1, ATP5D, ATP5E, ATP5EP2, ATP5F1, ATP5G1, ATP5G2, ATP5G3, ATP5H, ATP5I, ATP5J, ATP5J2, ATP5L, ATP5L2, ATP5O, ATP5S, ATP6, ATP8, ATPIF1, AURKAIP1, AVPR2, BCL2L1, BCS1L, BDH1, BOK, C1305…	Cluego
GO:0022613	ribonucleoprotein complex biogenesis	2.63675e-05	0.011338	[BYSL, CDC73, CNGB1, CSNK1E, DDX28, DDX49, EIF2S1, EXOSC4, GEMIN7, KRR1, MRPL13, MRTO4, NOC4L, NOP10, NOP16, POP4, PRPF19, PRPF31, RPP40, RPS14, RRP36, RRP8, RRS1, SNRPD1, TARBP2, UTP3, WDR18, WDR55]	[AAMP, AAR2, AATF, ABCE1, ABT1, ADAR, AGO1, AGO2, AGO3, AGO4, AK8, ANTXR1, ATM, ATR, ATXN2, ATXN2L, BICD1, BMS1, BMT2, BOP1, BRIX1, BUD23, BYSL, C1D, C1QBP, CD2BP2, CDC73, CDKN2A, CELF1, CELF2, CELF4, CHD7, CIRBP, CLNS1A, CLP1, CNGB1, CNOT1, CNOT2, CNOT6, CNOT6L, CNOT7, COLEC12, CRNKL1, CSNK1D, CSNK1E, DCAF13, DDX1, DDX20, DDX21, DDX23, DDX27, DDX28, DDX31, DDX39B, DDX3X, DDX47, DDX49, DDX51, DDX…	Cluego
GO:0030529	intracellular ribonucleoprotein complex	1.91733e-06	0.00084171	[ALYREF, BCAS2, CACTIN, CDK9, CHCHD1, CNGB1, CSNK1E, DDX28, DDX39A, EIF2S1, EIF4E, KRR1, LSM7, MAGOHB, MRPL13, MRPL14, MRPL15, MRPL20, MRPL24, MRPL27, MRPL41, MRPL52, MRPL54, MRPL55, MRPL58, NAA11, NOC4L, NOP10, PCBP4, POP4, POP5, PRPF19, PRPF31, PYDC1, RPP40, RPS14, RRP36, RRS1, RUVBL2, SF3B5, SNRPD1, SRA1, TARBP2, UTP3]	[AAMP, ABCF1, ACTB, ACTN4, ADAR, AGO1, AGO2, AGO3, AGO4, AJUBA, AKAP17A, ALYREF, ANKRD42, APEX1, API5, APOBEC3D, APOBEC3F, APOBEC3G, APOBEC3H, APOD, AQR, ARFGEF1, ARNTL, ASZ1, ATXN2, ATXN2L, AZU1, BARD1, BCAS2, BMS1, BOP1, BPI, BRCA1, BTBD1, BTBD2, BTBD6, BUD31, BVES, CACTIN, CALR, CANX, CAPRIN1, CARHSP1, CASC3, CCAR2, CCDC97, CD2BP2, CDC40, CDC42, CDC5L, CDK9, CELF1, CHCHD1, CHERP, CHTOP, CIRBP,…	Cluego
GO:0030681	multimeric ribonuclease P complex	6.11456e-05	0.0259257	[POP4, POP5, PYDC1, RPP40]	[BVES, NLRP2B, POP1, POP4, POP5, POP7, PYDC1, RPP30, RPP38, RPP40]	Cluego
GO:0031146	SCF-dependent proteasomal ubiquitin-dependent protein catabolic process	6.05328e-05	0.0257264	[FBXL15, PSMB3, PSMB5, PSMB6, PSMC6, PSMD12, PSMD3, RBX1, UBC]	[BTRC, CCNF, CUL1, FBXL15, FBXL18, FBXL2, FBXL3, FBXL5, FBXL7, FBXO2, FBXO31, FBXO39, FBXO4, FBXO6, FBXO9, FBXW11, FBXW4, FBXW5, FBXW7, KIF14, PSMA1, PSMA2, PSMA3, PSMA4, PSMA5, PSMA6, PSMA7, PSMA8, PSMB1, PSMB10, PSMB11, PSMB2, PSMB3, PSMB4, PSMB5, PSMB6, PSMB7, PSMB8, PSMB9, PSMC1, PSMC2, PSMC3, PSMC4, PSMC5, PSMC6, PSMD1, PSMD10, PSMD11, PSMD12, PSMD13, PSMD14, PSMD2, PSMD3, PSMD4, PSMD5, PSMD…	Cluego
GO:0031966	mitochondrial membrane	1.23387e-06	0.000544138	[AURKAIP1, C19orf70, CHCHD1, COASY, COQ4, COX14, CPOX, ETFDH, HOOK2, MIEF2, MRPL13, MRPL14, MRPL15, MRPL20, MRPL24, MRPL27, MRPL41, MRPL52, MRPL54, MRPL55, MRPL58, NDUFA12, NDUFAB1, NDUFB1, NDUFB7, OTC, ROMO1, SFI1, SLC25A17, SLC25A39, TIMM10, TIMM8B, TIMM9, TMEM11, UBC, UCP3, UQCC3, UQCR11, UQCRC1, UQCRH]	[ABCA12, ABCA8, ABCB10, ABCB6, ABCB7, ABCB8, ABCD3, ABCG2, ACAA2, ACACB, ACAD11, ACAD9, ACADL, ACADVL, ACAT1, ACSL1, ACSL3, ACSL4, ACSL5, ACSL6, AFG3L2, AGK, AGPAT5, AIFM1, AIFM2, AIFM3, AK2, AKAP1, ALAS2, ALDH18A1, ALDH3A2, AMBRA1, ANKZF1, ANXA1, AOC1, APOO, APOOL, ARG1, ARMCX3, ATAD3A, ATAD3B, ATCAY, ATF2, ATP5A1, ATP5B, ATP5C1, ATP5D, ATP5E, ATP5EP2, ATP5F1, ATP5G1, ATP5G2, ATP5G3, ATP5H, ATP5…	Cluego
GO:0031967	organelle envelope	9.3809e-06	0.00409945	[AHCTF1, AURKAIP1, C19orf70, CHCHD1, CHCHD5, CHMP2A, CLIC1, COASY, COQ4, COX14, CPOX, CPTP, DPY19L3, EBP, ETFDH, HOOK2, MATR3, MIEF2, MRPL13, MRPL14, MRPL15, MRPL20, MRPL24, MRPL27, MRPL41, MRPL52, MRPL54, MRPL55, MRPL58, NDUFA12, NDUFAB1, NDUFB1, NDUFB7, NOC4L, NUP85, OTC, ROMO1, SEC13, SFI1, SLC25A17, SLC25A39, TFPT, THOP1, TIMM10, TIMM8B, TIMM9, TMEM11, TNKS, UBC, UCP3, UQCC3, UQCR11, UQCRC1, …	[AAAS, ABCA12, ABCA8, ABCB10, ABCB6, ABCB7, ABCB8, ABCD3, ABCF1, ABCF2, ABCG2, ABL1, ACAA2, ACACB, ACAD11, ACAD9, ACADL, ACADVL, ACAT1, ACKR2, ACKR4, ACSL1, ACSL3, ACSL4, ACSL5, ACSL6, ADAP2, ADRA1A, ADRA1B, ADRA1D, AEN, AFG3L2, AGFG1, AGK, AGPAT3, AGPAT5, AHCTF1, AIFM1, AIFM2, AIFM3, AK2, AK9, AKAP1, AKAP6, AKIRIN1, ALAS2, ALDH18A1, ALDH3A2, ALG14, ALOX5, ALOX5AP, AMBRA1, ANKLE1, ANKRD17, ANKZF1…	Cluego
GO:0031975	envelope	9.5071e-06	0.0041451	[AHCTF1, AURKAIP1, C19orf70, CHCHD1, CHCHD5, CHMP2A, CLIC1, COASY, COQ4, COX14, CPOX, CPTP, DPY19L3, EBP, ETFDH, HOOK2, MATR3, MIEF2, MRPL13, MRPL14, MRPL15, MRPL20, MRPL24, MRPL27, MRPL41, MRPL52, MRPL54, MRPL55, MRPL58, NDUFA12, NDUFAB1, NDUFB1, NDUFB7, NOC4L, NUP85, OTC, ROMO1, SEC13, SFI1, SLC25A17, SLC25A39, TFPT, THOP1, TIMM10, TIMM8B, TIMM9, TMEM11, TNKS, UBC, UCP3, UQCC3, UQCR11, UQCRC1, …	[AAAS, ABCA12, ABCA8, ABCB10, ABCB6, ABCB7, ABCB8, ABCD3, ABCF1, ABCF2, ABCG2, ABL1, ACAA2, ACACB, ACAD11, ACAD9, ACADL, ACADVL, ACAT1, ACKR2, ACKR4, ACSL1, ACSL3, ACSL4, ACSL5, ACSL6, ADAP2, ADRA1A, ADRA1B, ADRA1D, AEN, AFG3L2, AGFG1, AGK, AGPAT3, AGPAT5, AHCTF1, AIFM1, AIFM2, AIFM3, AK2, AK9, AKAP1, AKAP6, AKIRIN1, ALAS2, ALDH18A1, ALDH3A2, ALG14, ALOX5, ALOX5AP, AMBRA1, ANKLE1, ANKRD17, ANKZF1…	Cluego
GO:0032543	mitochondrial translation	2.10746e-07	9.42033e-05	[AURKAIP1, CHCHD1, GATB, MRPL13, MRPL14, MRPL15, MRPL20, MRPL24, MRPL27, MRPL41, MRPL52, MRPL54, MRPL55, MRPL58, PTRH1]	[AARS2, ALKBH1, AURKAIP1, C1QBP, CDK5RAP1, CHCHD1, COA3, DAP3, DARS2, DLGAP3, EARS2, ERAL1, GADD45GIP1, GATB, GATC, GFM1, GFM2, HARS, LARS2, LRPPRC, MALSU1, MPV17L2, MRPL1, MRPL10, MRPL11, MRPL12, MRPL13, MRPL14, MRPL15, MRPL16, MRPL17, MRPL18, MRPL19, MRPL2, MRPL20, MRPL21, MRPL22, MRPL23, MRPL24, MRPL27, MRPL28, MRPL3, MRPL30, MRPL32, MRPL33, MRPL34, MRPL35, MRPL36, MRPL37, MRPL38, MRPL39, MRPL…	Cluego
GO:0034470	ncRNA processing	3.16835e-07	0.000141308	[BYSL, C2orf49, CNGB1, CSNK1E, DDX49, EXOSC4, FTSJ1, KRR1, METTL1, MRPL13, MRTO4, NOC4L, NOP10, POP4, POP5, PUS1, PUSL1, PYDC1, RPP40, RPS14, RRP36, RRP8, RRS1, TARBP2, TRUB2, USB1, UTP3, WDR18, WDR55]	[AARS, AARS2, ABT1, ADAR, ADAT1, ADAT2, ADAT3, AGO1, AGO2, AGO3, AGO4, ALKBH1, ALKBH8, BCDIN3D, BMS1, BMT2, BOP1, BUD23, BVES, BYSL, C14orf166, C1D, C2orf49, C9orf64, CDK5RAP1, CDKAL1, CDKN2A, CHD7, CLP1, CNGB1, COLEC12, CPSF1, CPSF4, CSNK1D, CSNK1E, CSTF2, CTU1, CTU2, DCAF13, DDX1, DDX21, DDX27, DDX47, DDX49, DDX51, DDX52, DDX56, DGCR8, DHX37, DICER1, DIEXF, DIMT1, DIS3, DIS3L, DIS3L2, DKC1, DRO…	Cluego
GO:0034660	ncRNA metabolic process	3.86544e-08	1.74718e-05	[BYSL, C2orf49, CDK7, CDK9, CNGB1, CSNK1E, DDX17, DDX49, DEDD2, EXOSC4, FTSJ1, GATB, HRAS, KRR1, METTL1, MRPL13, MRTO4, NOC4L, NOP10, POP4, POP5, POU2F1, PUS1, PUSL1, PYDC1, RARS, RPP40, RPS14, RRP36, RRP8, RRS1, SIRT7, TARBP2, TRUB2, USB1, UTP3, WDR18, WDR55]	[AARS, AARS2, AARSD1, ABT1, ADAR, ADAT1, ADAT2, ADAT3, AGO1, AGO2, AGO3, AGO4, AIMP1, AIMP2, ALKBH1, ALKBH8, ANG, ASZ1, ATN1, BCDIN3D, BMS1, BMT2, BOP1, BRF1, BUD23, BVES, BYSL, C14439, C14orf166, C1D, C2orf49, C9orf64, CARS, CARS2, CCNK, CCNT1, CCNT2, CD3EAP, CDK5RAP1, CDK7, CDK9, CDKAL1, CDKN2A, CELF3, CHD7, CLN5, CLP1, CNGB1, COLEC12, CPSF1, CPSF4, CSNK1D, CSNK1E, CSTF2, CTU1, CTU2, DALRD3, DA…	Cluego
GO:0042254	ribosome biogenesis	2.25439e-05	0.00976151	[BYSL, CNGB1, CSNK1E, DDX28, DDX49, EIF2S1, EXOSC4, KRR1, MRPL13, MRTO4, NOC4L, NOP10, NOP16, POP4, RPP40, RPS14, RRP36, RRP8, RRS1, UTP3, WDR18, WDR55]	[AAMP, AATF, ABCE1, ABT1, AK8, BMS1, BMT2, BOP1, BRIX1, BUD23, BYSL, C1D, C1QBP, CDKN2A, CHD7, CNGB1, CSNK1D, CSNK1E, DCAF13, DDX21, DDX27, DDX28, DDX31, DDX3X, DDX47, DDX49, DDX51, DDX52, DDX56, DHX30, DHX37, DIEXF, DIMT1, DIS3, DIS3L, DIS3L2, DKC1, DROSHA, EBNA1BP2, EFL1, EFNA1, EIF2A, EIF2S1, EIF4A3, EIF6, EMG1, ERAL1, ERI1, ERI2, ERI3, EXOSC1, EXOSC10, EXOSC2, EXOSC3, EXOSC4, EXOSC5, EXOSC6, …	Cluego
GO:0043241	protein complex disassembly	3.83931e-05	0.0164706	[AURKAIP1, CHCHD1, CHMP2A, CHMP5, MRPL13, MRPL14, MRPL15, MRPL20, MRPL24, MRPL27, MRPL41, MRPL52, MRPL54, MRPL55, MRPL58, PYM1, SH3BGRL3, SH3GL1]	[ABCE1, ACTN2, ADD1, ADD2, AMER1, APC, APEH, APP, ARHGEF2, ASPH, AURKAIP1, AVIL, AXIN1, BNIP3, C12orf65, C16542, C16orf45, CAPG, CAPZA1, CAPZA2, CAPZA3, CAPZB, CARMIL1, CARMIL2, CAV1, CCSAP, CFL1, CFL2, CHCHD1, CHMP1A, CHMP1B, CHMP2A, CHMP2B, CHMP5, CHMP7, CIB1, CKAP2, CLASP1, CLASP2, CSNK1A1, CTNNB1, DAP3, DDIT4, DLGAP3, DMTN, DNAJC6, DSTN, DVL1, DVL1P1, DVL2, DVL3, EIF5A, EIF5A2, EIF5AL1, EPS8,…	Cluego
GO:0044429	mitochondrial part	1.6598e-08	7.55208e-06	[ADPRHL2, AURKAIP1, C19orf70, CHCHD1, CHCHD5, CLPP, COASY, COQ4, COX14, CPOX, DDX28, ETFDH, FLAD1, GLRX5, HOOK2, LONP1, MIEF2, MPG, MRPL13, MRPL14, MRPL15, MRPL20, MRPL24, MRPL27, MRPL41, MRPL52, MRPL54, MRPL55, MRPL58, NDUFA12, NDUFAB1, NDUFB1, NDUFB7, NUDT2, OTC, PDHB, PDPR, PUS1, ROMO1, SDHAF1, SFI1, SLC25A17, SLC25A39, SUPV3L1, THOP1, TIMM10, TIMM8B, TIMM9, TMEM11, TXNRD2, UBC, UCP3, UQCC3, U…	[AADAT, AASS, ABAT, ABCA12, ABCA8, ABCB10, ABCB6, ABCB7, ABCB8, ABCD3, ABCE1, ABCF2, ABCG2, ABHD10, ACAA2, ACACB, ACAD10, ACAD11, ACAD8, ACAD9, ACADL, ACADM, ACADS, ACADSB, ACADVL, ACAT1, ACO2, ACOT2, ACOT9, ACP6, ACSF2, ACSF3, ACSL1, ACSL3, ACSL4, ACSL5, ACSL6, ACSM1, ACSM2A, ACSM2B, ACSM3, ACSM4, ACSM5, ACSM6, ACSS1, ACSS3, ADAP2, ADHFE1, ADPRHL2, AFG3L2, AGK, AGPAT5, AGXT, AGXT2, AIFM1, AIFM2,…	Cluego
GO:0044770	cell cycle phase transition	5.01343e-05	0.0214073	[AKAP9, ANAPC11, CDC73, CDK7, CDKN2D, CHMP2A, CNOT4, COASY, CSNK1E, DCTN2, EIF4E, FBXL15, LONP1, MDM4, MNAT1, PCBP4, PIM1, PSMB3, PSMB5, PSMB6, PSMC6, PSMD12, PSMD3, RAB8A, RANBP3, RBX1, SFI1, SIRT7, STXBP4, TPRA1, UBC]	[ABCB1, ACTR1A, ACVR1, ACVR1B, ADAM17, AIF1, AJUBA, AKAP8, AKAP8L, AKAP9, AKT1, ALMS1, ANAPC1, ANAPC10, ANAPC11, ANAPC15, ANAPC16, ANAPC2, ANAPC4, ANAPC5, ANAPC7, ANKRD17, ANLN, ANXA1, APC, APEX1, APP, ARID3A, ARPP19, ARTN, ATAD5, ATF5, ATM, ATP2B4, AURKA, BACH1, BAX, BCAT1, BCL2, BID, BIRC5, BLM, BORA, BRD4, BRD7, BRIP1, BRSK2, BTG2, BTRC, BUB1, BUB1B, BUB3, C10orf99, C16542, C8orf4, CACUL1, CAM…	Cluego
GO:0044772	mitotic cell cycle phase transition	5.49406e-05	0.0234047	[AKAP9, ANAPC11, CDC73, CDK7, CDKN2D, CHMP2A, CNOT4, COASY, CSNK1E, DCTN2, EIF4E, FBXL15, LONP1, MDM4, MNAT1, PCBP4, PIM1, PSMB3, PSMB5, PSMB6, PSMC6, PSMD12, PSMD3, RAB8A, RANBP3, RBX1, SFI1, SIRT7, TPRA1, UBC]	[ABCB1, ACTR1A, ACVR1, ACVR1B, ADAM17, AIF1, AJUBA, AKAP9, AKT1, ALMS1, ANAPC1, ANAPC10, ANAPC11, ANAPC15, ANAPC16, ANAPC2, ANAPC4, ANAPC5, ANAPC7, ANKRD17, ANLN, ANXA1, APC, APEX1, APP, ARID3A, ARPP19, ARTN, ATAD5, ATM, AURKA, BACH1, BAX, BCAT1, BCL2, BID, BIRC5, BLM, BORA, BRD4, BRD7, BRIP1, BRSK2, BTG2, BTRC, BUB1, BUB1B, BUB3, C16542, CACUL1, CAMK2A, CAMK2D, CAMK2G, CARM1, CASP2, CCNA1, CCNA2…	Cluego
GO:0070125	mitochondrial translational elongation	1.49789e-07	6.7255e-05	[AURKAIP1, CHCHD1, MRPL13, MRPL14, MRPL15, MRPL20, MRPL24, MRPL27, MRPL41, MRPL52, MRPL54, MRPL55, MRPL58]	[AURKAIP1, CHCHD1, DAP3, DLGAP3, ERAL1, GADD45GIP1, GFM1, MRPL1, MRPL10, MRPL11, MRPL12, MRPL13, MRPL14, MRPL15, MRPL16, MRPL17, MRPL18, MRPL19, MRPL2, MRPL20, MRPL21, MRPL22, MRPL23, MRPL24, MRPL27, MRPL28, MRPL3, MRPL30, MRPL32, MRPL33, MRPL34, MRPL35, MRPL36, MRPL37, MRPL38, MRPL39, MRPL4, MRPL40, MRPL41, MRPL42, MRPL43, MRPL44, MRPL45, MRPL46, MRPL47, MRPL48, MRPL49, MRPL50, MRPL51, MRPL52, M…	Cluego
GO:0070126	mitochondrial translational termination	1.71966e-07	7.70407e-05	[AURKAIP1, CHCHD1, MRPL13, MRPL14, MRPL15, MRPL20, MRPL24, MRPL27, MRPL41, MRPL52, MRPL54, MRPL55, MRPL58]	[AURKAIP1, CHCHD1, DAP3, DLGAP3, ERAL1, GADD45GIP1, GFM2, MRPL1, MRPL10, MRPL11, MRPL12, MRPL13, MRPL14, MRPL15, MRPL16, MRPL17, MRPL18, MRPL19, MRPL2, MRPL20, MRPL21, MRPL22, MRPL23, MRPL24, MRPL27, MRPL28, MRPL3, MRPL30, MRPL32, MRPL33, MRPL34, MRPL35, MRPL36, MRPL37, MRPL38, MRPL39, MRPL4, MRPL40, MRPL41, MRPL42, MRPL43, MRPL44, MRPL45, MRPL46, MRPL47, MRPL48, MRPL49, MRPL50, MRPL51, MRPL52, M…	Cluego
KEGG:03013	RNA transport	1.66175e-05	0.00721199	[ALYREF, EIF1, EIF2B3, EIF2S1, EIF4E, GEMIN7, MAGOHB, NUP85, POP4, POP5, PYM1, RPP25L, RPP40, SEC13, SMN2]	[AAAS, ACIN1, ALYREF, CASC3, CLNS1A, CYFIP1, CYFIP2, DDX20, DDX39B, EEF1A1, EEF1A2, EIF1, EIF1AX, EIF1AY, EIF1B, EIF2B1, EIF2B2, EIF2B3, EIF2B4, EIF2B5, EIF2S1, EIF2S2, EIF2S3, EIF3A, EIF3B, EIF3C, EIF3CL, EIF3D, EIF3E, EIF3F, EIF3G, EIF3H, EIF3I, EIF3J, EIF4A1, EIF4A2, EIF4A3, EIF4B, EIF4E, EIF4E1B, EIF4E2, EIF4EBP1, EIF4EBP2, EIF4EBP3, EIF4G1, EIF4G2, EIF4G3, EIF5, EIF5B, ELAC1, ELAC2, FMR1, FX…	Cluego
path:04810_1	Regulation of actin cytoskeleton	3.29352e-06	0.000115273	ABI2,APC2,MYLPF,HRAS,MYL5,SOS1,BCAR1	ABI2,APC2,PAK4,MYL12B,MYL9,MYL12A,DOCK1,RRAS2,MRAS,MYLPF,APC,HRAS,KRAS,MYL2,MYL5,MYLK,NRAS,PAK1,PAK2,PAK3,ARHGEF4,PAK6,PAK7,MYL7,RAC1,RAC2,RAC3,RRAS,SOS1,SOS2,MYLK2,MYLK3,MYL10,ARHGEF6,BCAR1	SubpathwayMiner
path:04010_1	MAPK signaling pathway	2.81817e-05	0.00049318	DAXX,ELK4,HRAS,MAP2K3,CACNG7,SOS1,MAPKAPK3,MKNK1	CACNG3,CACNG2,CHUK,MAPK14,DAXX,ELK4,RRAS2,MRAS,CACNG5,CACNG4,MKNK2,HRAS,IKBKB,KRAS,MAP3K1,MAP3K5,MOS,NRAS,PPM1A,CACNA2D3,MAPK1,MAPK3,MAPK8,MAPK11,MAPK9,MAPK10,MAPK13,MAP2K3,MAP2K6,RASGRF1,RASGRF2,CACNG8,CACNG7,CACNG6,RRAS,MAPK12,MAP2K4,SOS1,SOS2,MAP3K7,TP53,TRAF2,CACNA1A,CACNA1B,CACNA1C,CACNA1D,CACNA1E,CACNA1F,CACNA1S,CACNA2D1,CACNB1,CACNB2,CACNB3,CACNB4,CACNG1,MAPKAPK3,IKBKG,MKNK1,CACNA1I,CACNA1…	SubpathwayMiner
path:04910_1	Insulin signaling pathway	0.000237864	0.00277508	EIF4E,HRAS,SOS1,MKNK1	EIF4E,EIF4E1B,MKNK2,HRAS,ARAF,KRAS,NRAS,MAPK1,MAPK3,MAP2K1,MAP2K2,RAF1,SOS1,SOS2,BRAF,MKNK1,EIF4E2	SubpathwayMiner
path:04062_1	Chemokine signaling pathway	0.00037605	0.00329044	HCK,HRAS,SOS1,BCAR1	CSK,FGR,PIK3R5,HCK,HRAS,KRAS,LYN,NRAS,PIK3CA,PIK3CB,PIK3CD,PIK3CG,PIK3R1,PIK3R2,PTK2,SOS1,SOS2,PIK3R3,BCAR1	SubpathwayMiner
path:04510_1	Focal adhesion	0.000525827	0.00368079	MYLPF,HRAS,MYL5,SOS1,BCAR1	PAK4,MYL12B,MYL9,MYL12A,CRK,CRKL,PIK3R5,MYLPF,HRAS,MYL2,MYL5,MYLK,PAK1,PAK2,PAK3,PIK3CA,PIK3CB,PIK3CD,PIK3CG,PIK3R1,PIK3R2,PAK6,PAK7,PTK2,PXN,MYL7,RAF1,ACTB,SOS1,SOS2,ACTG1,PIK3R3,MYLK2,MYLK3,MYL10,BCAR1	SubpathwayMiner
path:04670_1	Leukocyte transendothelial migration	0.00364673	0.0175518	MYLPF,MYL5,BCAR1	MYL12B,MYL9,VAV3,MYL12A,MYLPF,ICAM1,ITGAL,RHOA,MYL2,MYL5,MYL7,ROCK1,VAV1,VAV2,MYL10,ROCK2,BCAR1	SubpathwayMiner
path:05160_1	Hepatitis C	0.00364673	0.0175518	EIF2S1,HRAS,SOS1	MAPK14,EIF2S1,EIF2AK1,HRAS,ARAF,KRAS,EIF2AK4,NRAS,MAPK11,MAPK13,EIF2AK2,RAF1,MAPK12,SOS1,SOS2,BRAF,EIF2AK3	SubpathwayMiner
path:04110_1	Cell cycle	0.00401185	0.0175518	CDK7,CDKN2D,ANAPC11,RBX1	CDK2,CDK4,CDK6,CDK7,CDKN1A,CDKN2D,ANAPC10,GADD45G,GADD45A,CDC26,ANAPC13,SFN,ANAPC2,ANAPC4,GADD45B,PCNA,FZR1,ANAPC5,ANAPC7,ANAPC11,ANAPC1,SKP1,TP53,CUL1,CCNB3,CDC23,CDC16,CCNB1,PKMYT1,CCNB2,CDK1,CDC25A,CDC27,RBX1	SubpathwayMiner
path:05221_1	Acute myeloid leukemia	0.00505451	0.0196564	HRAS,PIM1,SOS1	FLT3,PIK3R5,GRB2,HRAS,KRAS,NRAS,PIK3CA,PIK3CB,PIM1,PIK3CD,PIK3CG,PIK3R1,PIK3R2,SOS1,SOS2,STAT3,STAT5A,STAT5B,PIK3R3	SubpathwayMiner
path:04664_1	Fc epsilon RI signaling pathway	0.00674826	0.0219587	HRAS,MAP2K3,SOS1	PIK3R5,LAT,GRB2,HRAS,KRAS,NRAS,PIK3CA,PIK3CB,PIK3CD,PIK3CG,PIK3R1,PIK3R2,MAP2K3,MAP2K6,RAC1,RAC2,RAC3,SOS1,SOS2,SYK,PIK3R3	SubpathwayMiner
path:03320_1	PPAR signaling pathway	0.00690131	0.0219587	APOA1,UBC	CPT1C,CPT1A,CPT1B,APOA1,PPARA,PPARD,UBC	SubpathwayMiner
path:04662_1	B cell receptor signaling pathway	0.00874113	0.025495	HRAS,SOS1,BCL10	AKT3,PIK3AP1,AKT1,AKT2,PIK3R5,RASGRP3,GRB2,BLNK,HRAS,KRAS,NRAS,PIK3CA,PIK3CB,PIK3CD,PIK3CG,PIK3R1,PIK3R2,SOS1,SOS2,SYK,PIK3R3,IKBKG,BCL10	SubpathwayMiner
path:04710_1	Circadian rhythm - mammal	0.011541	0.0287314	CSNK1E,RBX1	CSNK1D,CSNK1E,ARNTL,PER1,SKP1,CUL1,PER3,PER2,RBX1	SubpathwayMiner
path:00520_1	Amino sugar and nucleotide sugar metabolism	0.0123134	0.0287314	GALK1,PMM1,NANS	GNPDA1,GNE,GNPDA2,GALK1,GALK2,GALT,GPI,MPI,AMDHD2,PGM1,PMM1,PMM2,NANS,PGM2,NAGK,RENBP	SubpathwayMiner
path:04660_1	T cell receptor signaling pathway	0.0123134	0.0287314	HRAS,SOS1,BCL10	AKT3,RASGRP1,NFAT5,MAP3K8,MAPK14,AKT1,AKT2,LAT,GRB2,GSK3B,HRAS,KRAS,NFATC1,NFATC2,NFATC3,NFATC4,NRAS,MAPK11,MAPK13,MAPK12,SOS1,SOS2,ZAP70,IKBKG,BCL10,MAP3K14	SubpathwayMiner
path:00860_1	Porphyrin and chlorophyll metabolism	0.0142489	0.0293361	CPOX,FTMT	CP,CPOX,FECH,FTH1,FTL,PPOX,FTMT	SubpathwayMiner
path:04350_1	TGF-beta signaling pathway	0.0142489	0.0293361	BMPR1A,RBX1	SMAD1,SMAD2,SMAD3,SMAD5,SMAD6,SMAD7,SMAD9,BMPR1A,BMPR1B,RBX1	SubpathwayMiner
path:04114_2	Oocyte meiosis	0.0198771	0.0381772	ANAPC11,PPP2R5D,RBX1	ANAPC10,MAD2L2,PTTG2,SGOL1,CDC26,ANAPC13,FBXO43,ANAPC2,ANAPC4,MAD2L1,ANAPC5,ANAPC7,ANAPC11,PPP2R5A,PPP2R5B,PPP2R5C,PPP2R5D,PPP2R5E,ANAPC1,SKP1,BUB1,CUL1,CDC23,CDC16,PTTG1,ESPL1,CDC20,CDC27,RBX1,REC8	SubpathwayMiner
path:04530_1	Tight junction	0.0207247	0.0381772	MYLPF,HRAS,MYL5,CRB3	INADL,MYL12B,MYL9,MYL12A,CLDN16,CLDN4,CLDN3,CLDN7,CLDN23,CLDN19,RRAS2,MRAS,MYH15,CLDN14,CLDN15,CLDN17,TJP3,MYLPF,HRAS,KRAS,MLLT4,MYH1,MYH2,MYH3,MYH4,MYH6,MYH7,MYH8,MYH9,MYH10,MYH11,MYL2,MYL5,NRAS,CLDN20,CLDN11,CLDN18,CLDN22,MYH7B,MYL7,ACTB,RRAS,MPP5,TJP1,ACTG1,CLDN5,MYH14,MYH13,CLDN10,CLDN8,CLDN6,CLDN2,CLDN1,CLDN9,CRB3,MYL10	SubpathwayMiner
path:00030_1	Pentose phosphate pathway	0.0238013	0.0396688	ALDOA,PGLS	ALDOA,ALDOB,RPIA,ALDOC,PGLS,PGD,TKT,TKTL1,TKTL2	SubpathwayMiner
path:00270_1	Cysteine and methionine metabolism	0.0238013	0.0396688	MAT2A,MPST	CTH,MAT2B,MAT1A,MAT2A,MPST,MTR,TST,CBS	SubpathwayMiner
path:00051_1	Fructose and mannose metabolism	0.0395135	0.0628624	ALDOA,PMM1	ALDOA,ALDOB,ALDOC,HK1,HK2,HK3,MPI,PFKL,PFKM,PFKP,PMM1,PMM2	SubpathwayMiner
path:04370_1	VEGF signaling pathway	0.0439132	0.0668245	HRAS,MAPKAPK3	MAPK14,HRAS,KDR,KRAS,NRAS,PLCG1,PLCG2,PRKCA,PRKCB,PRKCG,MAPK11,MAPK13,SPHK2,MAPK12,MAPKAPK3,SPHK1,MAPKAPK2,CDC42	SubpathwayMiner
path:04114_1	Oocyte meiosis	0.0532204	0.0760654	ANAPC11,RBX1	ANAPC10,PTTG2,CDC26,ANAPC13,FBXO43,ANAPC2,ANAPC4,ANAPC5,ANAPC7,ANAPC11,ANAPC1,SKP1,CUL1,CDC23,CDC16,PTTG1,CDC20,CDC27,RBX1	SubpathwayMiner
path:00240_1	Pyrimidine metabolism	0.0543324	0.0760654	TXNRD2,NUDT2,NME1,POLD4	NME6,TXNRD2,POLR3F,POLR3G,POLR3C,POLD3,POLR3A,TXNRD3,POLR3H,DTYMK,POLA2,POLR2J2,POLR1A,NME7,ZNRD1,NUDT2,ENTPD8,NME1,NME2,NME3,NME4,RRM2B,POLR1D,POLR3K,POLE3,POLA1,POLD1,POLD2,POLE,POLE2,POLR2A,POLR2B,POLR2C,POLR2D,POLR2E,POLR2F,POLR2G,POLR2H,POLR2I,POLR2J,POLR2K,POLR2L,POLR2J3,PRIM1,PRIM2,POLR3B,POLE4,POLD4,RRM1,RRM2,POLR1E,NME1-NME2,POLR3D,TXNRD1,NME5,POLR1B,POLR3GL,PNPT1,ENTPD1,POLR1C,ENTPD3	SubpathwayMiner
path:00010_1	Glycolysis / Gluconeogenesis	0.0581122	0.078228	ALDOA,PDHB	ENO1,ENO2,ENO3,ALDOA,ALDOB,ALDOC,PGAM4,PDHA1,PDHA2,PDHB,PGAM1,PGAM2,PKLR,PKM,BPGM	SubpathwayMiner
path:00230_1	Purine metabolism	0.0656252	0.0850697	NUDT2,APRT,NME1,POLD4	NME6,ADCY1,POLD3,ADCY2,PDE10A,ADCY3,ADCY5,ADCY6,ADCY7,ADCY8,ADCY9,ADCY4,POLA2,AMPD1,AMPD2,PDE7B,AMPD3,GMPR,NME7,NUDT2,APRT,IMPDH1,IMPDH2,ITPA,ENTPD8,ATIC,NME1,NME2,NME3,NME4,RRM2B,PDE11A,GMPR2,PDE1A,PDE1C,PDE2A,PDE3A,PDE3B,PDE4A,PDE4B,PDE4C,PDE4D,PDE7A,PDE8A,PDE1B,POLE3,POLA1,POLD1,POLD2,POLE,POLE2,PRIM1,PRIM2,ADCY10,POLE4,POLD4,RRM1,RRM2,NME1-NME2,NME5,PDE8B,ENTPD1,ENTPD3	SubpathwayMiner
path:00100_1	Steroid biosynthesis	0.0728146	0.0910182	EBP	EBP,DHCR24	SubpathwayMiner
path:00531_1	Glycosaminoglycan degradation	0.0901759	0.108833	HYAL2	HYAL4,HYAL1,SPAM1,HYAL3,HYAL2	SubpathwayMiner
path:00564_1	Glycerophospholipid metabolism	0.0961286	0.11215	AGPAT2,CHAT	CEPT1,AGPAT1,AGPAT2,CHAT,CHKA,CHKB,MBOAT2,MBOAT1,DGKA,DGKB,DGKG,DGKH,DGKQ,LCLAT1,PCYT1A,AGPAT3,AGPAT4,CHPT1,DGKZ,DGKE,DGKD,DGKI,PCYT1B	SubpathwayMiner
path:00562_1	Inositol phosphate metabolism	0.123931	0.139923	INPP5K	INPP5J,INPP5A,INPPL1,INPP5K,MINPP1	SubpathwayMiner
path:04070_1	Phosphatidylinositol signaling system	0.140338	0.153494	INPP5K	INPP5J,INPP5A,INPPL1,ITPKA,ITPKB,INPP5K	SubpathwayMiner
path:00983_1	Drug metabolism - other enzymes	0.187739	0.199117	TPMT	HPRT1,IMPDH1,IMPDH2,TPMT,GMPS	SubpathwayMiner
path:00140_1	Steroid hormone biosynthesis	0.217882	0.224291	HSD17B1	CYP1A1,CYP3A7,CYP3A4,CYP3A5,HSD17B1,HSD17B2,HSD17B12,HSD17B7,CYP3A43,HSD17B8,HSD17B6	SubpathwayMiner
path:04740_1	Olfactory transduction	0.909557	0.909557	OR52W1,CNGB1,OR1S2,OR52H1	OR5I1,ADCY3,OR52E2,OR52J3,OR51L1,OR51A7,OR51S1,OR51F2,OR52R1,OR4C46,OR4X2,OR4B1,OR52M1,OR52K2,OR5P2,OR5P3,OR8I2,OR2D3,OR2D2,OR52W1,OR56A4,OR56A1,OR10P1,OR10AD1,OR10A7,OR4K14,OR4L1,OR11H6,OR4D2,CNGB1,OR7D4,OR7G1,OR1M1,CNGA3,CNGA4,OR1I1,OR10H4,OR2M5,OR2M3,OR2T12,OR14C36,OR2T34,OR2T10,OR2T4,OR2T11,OR10J5,OR2B11,OR10T2,OR10X1,OR10Z1,OR6K6,OR6N1,OR9A4,OR2Y1,OR9A2,OR2A14,OR6B1,OR2F2,OR13C5,OR13C8,OR13C…	SubpathwayMiner
