# Supplementary material for: Construction of the Six-lncRNA Prognosis Signature as a Novel Biomarker in Esophageal Squamous Cell Carcinoma
Source: Front Genet. 2022 Mar 31;13:839589. doi: 10.3389/fgene.2022.839589 (PMC9008717; doi:10.3389/fgene.2022.839589)
Supplement: Supplementary file 4 [file Table1.XLSX]

## Sheet: probe2gene
Probe_ID@GPL18109	Ensembl_ID
43764	ENSG00000144036
7230	ENSG00000084710
104693	ENSG00000239306
121116	ENSG00000066777
69446	ENSG00000101019
63566	ENSG00000135930
7742	ENSG00000185920
19476	ENSG00000211776
90929	ENSG00000211787
6840	ENSG00000275791
106999	ENSG00000211779
97806	ENSG00000211819
36308	ENSG00000211820
11103	ENSG00000275158
148720	ENSG00000278030
106705	ENSG00000221923
57932	ENSG00000115204
143506	ENSG00000068796
26101	ENSG00000279380
96672	ENSG00000072609
39814	ENSG00000279530
76790	ENSG00000089157
33106	ENSG00000219200
34991	ENSG00000279386
78044	ENSG00000279214
50156	ENSG00000280360
35004	ENSG00000162222
31709	ENSG00000185674
53134	ENSG00000176087
81405	ENSG00000150967
76640	ENSG00000198515
77790	ENSG00000280273
73090	ENSG00000215182
36052	ENSG00000132437
95735	ENSG00000159147
45991	ENSG00000113269
165302	ENSG00000170100
68646	ENSG00000197536
36584	ENSG00000275465
131085	ENSG00000141431
39058	ENSG00000159307
30929	ENSG00000101425
12776	ENSG00000120820
97477	ENSG00000197050
57369	ENSG00000213923
51452	ENSG00000161929
39587	ENSG00000157110
19788	ENSG00000136152
76028	ENSG00000259529
70395	ENSG00000107104
36909	ENSG00000183853
302	ENSG00000140263
32339	ENSG00000181894
4609	ENSG00000250120
43347	ENSG00000085274
75114	ENSG00000136153
43672	ENSG00000105497
60335	ENSG00000115592
67721	ENSG00000135116
55841	ENSG00000126773
71263	ENSG00000180347
14430	ENSG00000180822
25284	ENSG00000071205
70507	ENSG00000128340
75412	ENSG00000124588
29704	ENSG00000182768
82745	ENSG00000166105
40015	ENSG00000011485
32733	ENSG00000060069
30970	ENSG00000157680
131905	ENSG00000065615
37939	ENSG00000205363
15651	ENSG00000119688
33574	ENSG00000196417
133230	ENSG00000167522
105833	ENSG00000120549
64853	ENSG00000236699
62631	ENSG00000133477
40690	ENSG00000197136
7953	ENSG00000204519
67289	ENSG00000106460
16501	ENSG00000121964
51922	ENSG00000164366
3153	ENSG00000206579
24960	ENSG00000150672
91167	ENSG00000250091
65824	ENSG00000185736
20091	ENSG00000196391
2397	ENSG00000149575
1668	ENSG00000013374
14342	ENSG00000188906
65187	ENSG00000124782
145620	ENSG00000214021
94495	ENSG00000211798
53032	ENSG00000120899
106190	ENSG00000116151
64759	ENSG00000111596
6497	ENSG00000155085
31264	ENSG00000100012
32343	ENSG00000182985
142444	ENSG00000185946
4581	ENSG00000254999
68642	ENSG00000124731
20470	ENSG00000277586
38325	ENSG00000135930
40510	ENSG00000182986
27246	ENSG00000188130
92155	ENSG00000082293
92208	ENSG00000002330
98527	ENSG00000163001
16506	ENSG00000163017
157176	ENSG00000065371
63558	ENSG00000169203
54906	ENSG00000109971
44649	ENSG00000243279
5308	ENSG00000095002
37730	ENSG00000159228
40707	ENSG00000168014
5333	ENSG00000116030
160033	ENSG00000170035
158263	ENSG00000102158
57135	ENSG00000131018
80720	ENSG00000163492
27258	ENSG00000152749
46517	ENSG00000150275
54572	ENSG00000211804
149361	ENSG00000204960
14762	ENSG00000112541
106800	ENSG00000063245
62818	ENSG00000135521
38862	ENSG00000196843
15246	ENSG00000002834
51818	ENSG00000259316
16691	ENSG00000188393
49142	ENSG00000147403
124830	ENSG00000214046
108641	ENSG00000187954
66185	ENSG00000106615
3305	ENSG00000176894
47502	ENSG00000136235
125645	ENSG00000141298
19724	ENSG00000259305
26872	ENSG00000121440
52326	ENSG00000127914
46097	ENSG00000181104
135082	ENSG00000275765
76792	ENSG00000198799
90179	ENSG00000187860
52222	ENSG00000185480
66526	ENSG00000113615
68570	ENSG00000173535
54576	ENSG00000205758
63726	ENSG00000112237
44647	ENSG00000065882
33536	ENSG00000157423
115693	ENSG00000182473
16758	ENSG00000105426
70516	ENSG00000126773
33390	ENSG00000198862
160393	ENSG00000183751
33419	ENSG00000066427
135303	ENSG00000168314
4848	ENSG00000197020
38329	ENSG00000137869
96527	ENSG00000204193
36186	ENSG00000172264
58431	ENSG00000130226
22152	ENSG00000198947
11510	ENSG00000154217
637	ENSG00000153827
133835	ENSG00000139865
41700	ENSG00000144824
86131	ENSG00000166206
70485	ENSG00000118960
40612	ENSG00000138641
17704	ENSG00000162086
5754	ENSG00000176155
6221	ENSG00000172349
121349	ENSG00000138036
2119	ENSG00000183530
6283	ENSG00000144130
42628	ENSG00000065618
54817	ENSG00000091136
44244	ENSG00000160218
61317	ENSG00000179915
28515	ENSG00000151229
101898	ENSG00000084674
60246	ENSG00000141367
81085	ENSG00000107077
38402	ENSG00000118960
93346	ENSG00000020577
55789	ENSG00000127328
28197	ENSG00000184459
41888	ENSG00000185055
24761	ENSG00000145391
26831	ENSG00000198160
110519	ENSG00000183576
11939	ENSG00000125089
111879	ENSG00000279735
25305	ENSG00000128284
25246	ENSG00000211807
75236	ENSG00000204060
30134	ENSG00000053747
23555	ENSG00000123572
25561	ENSG00000092051
130437	ENSG00000115935
46413	ENSG00000165219
568	ENSG00000137267
121334	ENSG00000134326
12884	ENSG00000206432
52666	ENSG00000102144
101121	ENSG00000109586
143750	ENSG00000140988
24264	ENSG00000278662
14965	ENSG00000101290
23834	ENSG00000197249
106143	ENSG00000067365
9770	ENSG00000106526
33800	ENSG00000141639
15148	ENSG00000011523
21817	ENSG00000278899
32406	ENSG00000131043
145487	ENSG00000130303
120829	ENSG00000071082
115680	ENSG00000177733
21494	ENSG00000118961
143038	ENSG00000184226
132568	ENSG00000212747
15084	ENSG00000163374
109340	ENSG00000160145
26345	ENSG00000113368
67671	ENSG00000197302
118447	ENSG00000020577
19818	ENSG00000128699
106217	ENSG00000100376
30853	ENSG00000123989
170406	ENSG00000133316
15171	ENSG00000100034
85933	ENSG00000032389
42476	ENSG00000156113
132856	ENSG00000106701
19133	ENSG00000135547
73301	ENSG00000123144
21965	ENSG00000111737
8769	ENSG00000123739
105285	ENSG00000054611
99943	ENSG00000130203
19989	ENSG00000060491
26057	ENSG00000168077
26187	ENSG00000109501
53832	ENSG00000100284
73728	ENSG00000170425
38822	ENSG00000188710
88960	ENSG00000211795
102928	ENSG00000211785
124030	ENSG00000066468
18824	ENSG00000111371
109636	ENSG00000138079
101807	ENSG00000138079
157101	ENSG00000183914
80335	ENSG00000021776
48202	ENSG00000089682
1922	ENSG00000124490
2614	ENSG00000101190
128946	ENSG00000048471
2462	ENSG00000089335
30982	ENSG00000104885
91055	ENSG00000255587
39796	ENSG00000078795
37030	ENSG00000113441
26735	ENSG00000115042
157444	ENSG00000117507
150125	ENSG00000118513
120200	ENSG00000119596
28866	ENSG00000119608
89198	ENSG00000120137
40485	ENSG00000169126
98712	ENSG00000138286
30534	ENSG00000104915
80796	ENSG00000124019
66336	ENSG00000124215
60781	ENSG00000130584
100360	ENSG00000125827
7373	ENSG00000269190
22008	ENSG00000131951
32641	ENSG00000133935
59693	ENSG00000134548
42435	ENSG00000135974
69874	ENSG00000137720
47976	ENSG00000065325
142457	ENSG00000105261
68615	ENSG00000085831
28645	ENSG00000120471
3817	ENSG00000077549
61512	ENSG00000077549
25409	ENSG00000138759
157296	ENSG00000114124
101947	ENSG00000145022
58805	ENSG00000140025
132271	ENSG00000140299
77106	ENSG00000143554
48967	ENSG00000144036
114843	ENSG00000144535
29895	ENSG00000144649
10661	ENSG00000145832
81919	ENSG00000147234
134132	ENSG00000148357
35687	ENSG00000149443
128643	ENSG00000160588
77783	ENSG00000149599
50954	ENSG00000151838
30129	ENSG00000153093
65441	ENSG00000153230
10533	ENSG00000156735
12370	ENSG00000184863
87791	ENSG00000158220
139276	ENSG00000144036
29457	ENSG00000159307
112294	ENSG00000161888
21476	ENSG00000127580
60663	ENSG00000162913
5305	ENSG00000079246
37397	ENSG00000163945
60176	ENSG00000164619
63925	ENSG00000171044
115984	ENSG00000164808
78352	ENSG00000133943
131360	ENSG00000188596
94916	ENSG00000166268
68874	ENSG00000166329
69583	ENSG00000100036
69334	ENSG00000167615
26797	ENSG00000129194
65729	ENSG00000168079
98763	ENSG00000171016
57303	ENSG00000148357
96319	ENSG00000169118
28490	ENSG00000170959
10492	ENSG00000172159
84595	ENSG00000164929
119149	ENSG00000198674
34865	ENSG00000197774
60342	ENSG00000174776
89726	ENSG00000255508
133425	ENSG00000138658
163919	ENSG00000144893
6161	ENSG00000138777
78928	ENSG00000175073
14784	ENSG00000131044
100113	ENSG00000120029
12680	ENSG00000149452
144270	ENSG00000108848
58067	ENSG00000174206
113907	ENSG00000174450
9525	ENSG00000106948
51976	ENSG00000155034
96189	ENSG00000257335
3981	ENSG00000181626
106470	ENSG00000180573
20708	ENSG00000169641
22299	ENSG00000176531
37202	ENSG00000080802
20787	ENSG00000065243
63075	ENSG00000141499
37635	ENSG00000131620
90184	ENSG00000174446
73293	ENSG00000277932
11087	ENSG00000140025
109568	ENSG00000179909
33151	ENSG00000125703
92505	ENSG00000177275
149704	ENSG00000178734
95527	ENSG00000197309
4973	ENSG00000197309
36528	ENSG00000141425
15142	ENSG00000172954
76754	ENSG00000131686
11409	ENSG00000166839
9795	ENSG00000176540
6053	ENSG00000130856
54354	ENSG00000248905
167516	ENSG00000110799
110532	ENSG00000163082
128435	ENSG00000179615
49208	ENSG00000179240
64485	ENSG00000171634
21815	ENSG00000176904
116116	ENSG00000167182
26759	ENSG00000140153
24178	ENSG00000180574
110807	ENSG00000147905
47092	ENSG00000171574
76383	ENSG00000140254
55518	ENSG00000177800
47341	ENSG00000048471
86049	ENSG00000181215
72555	ENSG00000124098
21349	ENSG00000155975
38274	ENSG00000180182
112700	ENSG00000142082
12936	ENSG00000147789
55200	ENSG00000178796
140875	ENSG00000118492
130057	ENSG00000165996
16032	ENSG00000181355
118792	ENSG00000124721
20651	ENSG00000173124
75190	ENSG00000186026
78980	ENSG00000100336
59990	ENSG00000180881
35153	ENSG00000065413
15394	ENSG00000185453
135599	ENSG00000163803
146962	ENSG00000170448
11682	ENSG00000052850
51609	ENSG00000184330
69396	ENSG00000184682
89488	ENSG00000182798
25185	ENSG00000183066
136904	ENSG00000176974
92987	ENSG00000183317
143507	ENSG00000169715
46144	ENSG00000183146
92033	ENSG00000099942
68554	ENSG00000183921
64246	ENSG00000185662
57262	ENSG00000164929
14472	ENSG00000185716
26708	ENSG00000163738
9544	ENSG00000258839
11582	ENSG00000127325
97424	ENSG00000075651
7131	ENSG00000164287
42886	ENSG00000183938
44404	ENSG00000184321
114105	ENSG00000215029
54076	ENSG00000182263
64129	ENSG00000259803
28342	ENSG00000129116
135795	ENSG00000181322
107812	ENSG00000187268
30471	ENSG00000152413
79160	ENSG00000184470
48064	ENSG00000186367
108747	ENSG00000186924
52320	ENSG00000197779
94102	ENSG00000265190
40620	ENSG00000174483
28121	ENSG00000125675
65622	ENSG00000071537
17281	ENSG00000162913
29081	ENSG00000182621
84876	ENSG00000121904
21594	ENSG00000115419
4367	ENSG00000168589
33168	ENSG00000188493
126474	ENSG00000197653
86419	ENSG00000072756
57735	ENSG00000104375
46251	ENSG00000151148
13381	ENSG00000088387
95204	ENSG00000153093
40310	ENSG00000165105
15580	ENSG00000130396
19435	ENSG00000154529
17992	ENSG00000135047
64596	ENSG00000136527
41968	ENSG00000028277
15819	ENSG00000157087
88115	ENSG00000170959
99987	ENSG00000151474
85279	ENSG00000180902
124635	ENSG00000171634
57696	ENSG00000204130
8648	ENSG00000064393
42862	ENSG00000163291
38388	ENSG00000122376
34141	ENSG00000187690
31280	ENSG00000189362
142970	ENSG00000139597
99883	ENSG00000186260
20090	ENSG00000163492
79550	ENSG00000188032
143440	ENSG00000038382
20539	ENSG00000189045
13279	ENSG00000150967
78505	ENSG00000264343
116530	ENSG00000188529
113198	ENSG00000187720
64789	ENSG00000164175
53551	ENSG00000198090
122051	ENSG00000101126
120084	ENSG00000148737
46814	ENSG00000049618
6496	ENSG00000073146
40850	ENSG00000110011
1121	ENSG00000141337
126661	ENSG00000197454
9866	ENSG00000255587
3852	ENSG00000187239
98107	ENSG00000144481
1887	ENSG00000134744
55171	ENSG00000184949
36992	ENSG00000255524
81922	ENSG00000127463
130686	ENSG00000173626
92269	ENSG00000215182
80237	ENSG00000114062
91613	ENSG00000140274
108088	ENSG00000279906
8174	ENSG00000184445
112760	ENSG00000135127
74706	ENSG00000147679
99968	ENSG00000162105
9378	ENSG00000196350
27349	ENSG00000198198
45898	ENSG00000139160
10988	ENSG00000197705
1584	ENSG00000088038
50695	ENSG00000198546
5024	ENSG00000142892
35159	ENSG00000196787
42865	ENSG00000066468
112821	ENSG00000186994
88379	ENSG00000148204
18300	ENSG00000196132
1674	ENSG00000170074
82306	ENSG00000125430
27561	ENSG00000198840
18009	ENSG00000212907
61569	ENSG00000198886
101330	ENSG00000198888
115689	ENSG00000198763
10749	ENSG00000198786
10990	ENSG00000198804
104537	ENSG00000198695
66460	ENSG00000198712
82222	ENSG00000198899
12820	ENSG00000116237
36771	ENSG00000279745
11479	ENSG00000205683
26787	ENSG00000175137
585	ENSG00000117020
61667	ENSG00000119285
39000	ENSG00000086619
65004	ENSG00000143674
58192	ENSG00000135801
92124	ENSG00000154370
153930	ENSG00000154358
42705	ENSG00000143772
167523	ENSG00000143799
75091	ENSG00000164488
46304	ENSG00000143771
17410	ENSG00000203697
79431	ENSG00000112499
29373	ENSG00000146425
11052	ENSG00000122335
52143	ENSG00000133056
20532	ENSG00000120256
48741	ENSG00000151414
45886	ENSG00000143355
3922	ENSG00000111961
53111	ENSG00000162704
80855	ENSG00000146416
54368	ENSG00000240021
21834	ENSG00000164440
48772	ENSG00000152061
94653	ENSG00000016402
12689	ENSG00000135541
75371	ENSG00000117475
124236	ENSG00000185860
154379	ENSG00000132196
88027	ENSG00000132196
43213	ENSG00000158869
9982	ENSG00000158859
28348	ENSG00000158796
21355	ENSG00000112282
54519	ENSG00000163564
99834	ENSG00000160856
144080	ENSG00000143297
9977	ENSG00000143297
42798	ENSG00000163462
15466	ENSG00000130643
58093	ENSG00000130643
20613	ENSG00000196911
18771	ENSG00000171811
36386	ENSG00000165752
100174	ENSG00000143621
65009	ENSG00000160679
12932	ENSG00000203780
48703	ENSG00000188690
78386	ENSG00000112367
113881	ENSG00000155085
99700	ENSG00000155085
86566	ENSG00000112335
5386	ENSG00000130348
43850	ENSG00000163125
9764	ENSG00000151923
32882	ENSG00000188316
118361	ENSG00000132423
110975	ENSG00000151553
35918	ENSG00000135333
31813	ENSG00000271601
26568	ENSG00000119927
44611	ENSG00000134258
125368	ENSG00000111880
14123	ENSG00000116824
37253	ENSG00000163399
93266	ENSG00000177551
151564	ENSG00000175984
14843	ENSG00000007341
30758	ENSG00000171385
14303	ENSG00000120051
6602	ENSG00000197748
56276	ENSG00000118420
108271	ENSG00000177301
25330	ENSG00000112706
27777	ENSG00000162631
119883	ENSG00000198408
6897	ENSG00000137996
26943	ENSG00000101986
119757	ENSG00000137992
107342	ENSG00000122435
6494	ENSG00000122435
22956	ENSG00000125534
79824	ENSG00000137962
36122	ENSG00000119906
53706	ENSG00000130032
90484	ENSG00000203910
131645	ENSG00000185760
85452	ENSG00000023839
116571	ENSG00000112305
70066	ENSG00000155966
79462	ENSG00000185985
49995	ENSG00000112280
82578	ENSG00000189326
74405	ENSG00000171858
26815	ENSG00000055732
84279	ENSG00000156925
22273	ENSG00000171160
83651	ENSG00000241935
13628	ENSG00000117133
89451	ENSG00000022267
118897	ENSG00000142875
98783	ENSG00000112200
80816	ENSG00000112200
20680	ENSG00000117114
92943	ENSG00000259030
85451	ENSG00000012660
23174	ENSG00000134597
40061	ENSG00000033122
129567	ENSG00000033122
95893	ENSG00000116729
18763	ENSG00000187122
75162	ENSG00000185483
46748	ENSG00000122121
103976	ENSG00000269920
58452	ENSG00000119977
23765	ENSG00000173406
58214	ENSG00000125675
47199	ENSG00000116209
80536	ENSG00000148408
62512	ENSG00000116212
123616	ENSG00000081870
168877	ENSG00000081870
62051	ENSG00000196284
22207	ENSG00000165802
12299	ENSG00000096401
44275	ENSG00000138119
89707	ENSG00000162383
113953	ENSG00000134717
36147	ENSG00000107317
1646	ENSG00000130558
4511	ENSG00000130558
100568	ENSG00000186094
144636	ENSG00000169925
94800	ENSG00000126016
131408	ENSG00000148308
5960	ENSG00000148604
48252	ENSG00000172426
37358	ENSG00000196358
104322	ENSG00000122359
61431	ENSG00000122359
18553	ENSG00000126106
53739	ENSG00000160539
32104	ENSG00000189129
106615	ENSG00000126878
60039	ENSG00000124140
37055	ENSG00000170935
96470	ENSG00000142949
115660	ENSG00000147224
51185	ENSG00000117394
25830	ENSG00000101473
56106	ENSG00000171960
7845	ENSG00000171960
99935	ENSG00000127125
12634	ENSG00000127124
152500	ENSG00000204060
61459	ENSG00000167118
78465	ENSG00000167113
124980	ENSG00000168734
68366	ENSG00000137413
81612	ENSG00000102362
75483	ENSG00000164663
53358	ENSG00000136908
81581	ENSG00000054116
42240	ENSG00000124177
66904	ENSG00000079332
11677	ENSG00000042286
23901	ENSG00000163867
34102	ENSG00000182035
98134	ENSG00000121904
61274	ENSG00000121903
1843	ENSG00000119408
150866	ENSG00000198034
92623	ENSG00000056586
20799	ENSG00000204131
51829	ENSG00000171459
104778	ENSG00000151150
78785	ENSG00000119397
114980	ENSG00000119397
52672	ENSG00000158161
51537	ENSG00000095261
40525	ENSG00000078725
29123	ENSG00000095397
893	ENSG00000090020
83136	ENSG00000090020
46678	ENSG00000196739
70611	ENSG00000165606
16316	ENSG00000204161
124194	ENSG00000204161
32338	ENSG00000107643
38589	ENSG00000165185
33277	ENSG00000147164
77354	ENSG00000099290
33701	ENSG00000204183
105420	ENSG00000117602
104717	ENSG00000107551
30389	ENSG00000030304
14591	ENSG00000030304
12128	ENSG00000165124
7743	ENSG00000204193
113473	ENSG00000119328
37507	ENSG00000162552
4182	ENSG00000142789
155631	ENSG00000148498
39169	ENSG00000204305
8008	ENSG00000158816
105828	ENSG00000162543
51442	ENSG00000136937
51168	ENSG00000127481
74614	ENSG00000204334
26031	ENSG00000107968
121540	ENSG00000048828
95336	ENSG00000159363
60565	ENSG00000204365
55029	ENSG00000106823
25733	ENSG00000187144
19481	ENSG00000197183
71439	ENSG00000197183
18974	ENSG00000116138
1980	ENSG00000116138
54004	ENSG00000083223
155334	ENSG00000083223
156297	ENSG00000204464
57643	ENSG00000135040
65048	ENSG00000135040
68421	ENSG00000269343
86416	ENSG00000136750
88368	ENSG00000204532
40505	ENSG00000095777
62054	ENSG00000095777
95247	ENSG00000269313
97422	ENSG00000269313
46044	ENSG00000165118
1661	ENSG00000141034
34807	ENSG00000099256
1618	ENSG00000107863
105691	ENSG00000175206
4999	ENSG00000196781
77559	ENSG00000011021
47658	ENSG00000204571
30082	ENSG00000204572
51376	ENSG00000167759
111523	ENSG00000156017
12728	ENSG00000134873
5816	ENSG00000078061
54739	ENSG00000135048
101840	ENSG00000135048
113922	ENSG00000078114
23925	ENSG00000130939
46055	ENSG00000174456
64983	ENSG00000204702
100191	ENSG00000188647
10306	ENSG00000162441
49334	ENSG00000119139
5424	ENSG00000170085
18286	ENSG00000089101
27748	ENSG00000197363
71366	ENSG00000142583
34515	ENSG00000068831
124839	ENSG00000154529
89831	ENSG00000197061
102689	ENSG00000107611
78121	ENSG00000069812
46316	ENSG00000069812
79744	ENSG00000112337
60229	ENSG00000107185
13153	ENSG00000147044
150625	ENSG00000248098
61779	ENSG00000116198
44826	ENSG00000152463
32206	ENSG00000122779
15810	ENSG00000102531
72092	ENSG00000185753
75052	ENSG00000137101
144164	ENSG00000137101
110917	ENSG00000183337
77690	ENSG00000152954
41676	ENSG00000116151
64000	ENSG00000164406
29911	ENSG00000205081
9316	ENSG00000180481
75559	ENSG00000101311
143110	ENSG00000109118
86278	ENSG00000068305
161581	ENSG00000123200
47602	ENSG00000151718
45109	ENSG00000157625
64597	ENSG00000198814
16383	ENSG00000198814
31773	ENSG00000169297
65781	ENSG00000188408
47461	ENSG00000188408
2081	ENSG00000007372
25838	ENSG00000153896
157126	ENSG00000137073
61367	ENSG00000130066
125039	ENSG00000131591
2364	ENSG00000123131
56970	ENSG00000123131
120386	ENSG00000112137
52824	ENSG00000111863
70733	ENSG00000205274
113081	ENSG00000133816
85117	ENSG00000135447
78457	ENSG00000198879
119192	ENSG00000131828
54914	ENSG00000134470
103510	ENSG00000057608
62099	ENSG00000198171
19614	ENSG00000036530
38653	ENSG00000182287
62995	ENSG00000169249
32632	ENSG00000132837
32542	ENSG00000244734
7069	ENSG00000099385
58966	ENSG00000125787
96039	ENSG00000137154
50101	ENSG00000137145
67554	ENSG00000177398
38170	ENSG00000147872
32944	ENSG00000177627
85635	ENSG00000147874
22705	ENSG00000120907
14648	ENSG00000205549
17385	ENSG00000053918
142548	ENSG00000164975
38967	ENSG00000187134
55996	ENSG00000141505
58146	ENSG00000077238
50815	ENSG00000147862
159968	ENSG00000054611
81649	ENSG00000186994
108945	ENSG00000135226
17710	ENSG00000164197
116444	ENSG00000133687
27345	ENSG00000185736
6075	ENSG00000047056
89856	ENSG00000196208
92684	ENSG00000151240
134822	ENSG00000150873
27242	ENSG00000159140
23548	ENSG00000120158
139361	ENSG00000139496
23315	ENSG00000080298
17761	ENSG00000080298
4648	ENSG00000136237
66724	ENSG00000205853
42964	ENSG00000244242
58737	ENSG00000139865
74157	ENSG00000129493
73160	ENSG00000099625
50278	ENSG00000185187
49279	ENSG00000104728
3437	ENSG00000183878
39968	ENSG00000279508
46447	ENSG00000186814
31721	ENSG00000279508
1794	ENSG00000255552
82869	ENSG00000255552
58436	ENSG00000206527
65300	ENSG00000163681
32871	ENSG00000163491
14649	ENSG00000197603
28268	ENSG00000205301
137601	ENSG00000146776
48687	ENSG00000188522
41315	ENSG00000188554
156772	ENSG00000173157
12995	ENSG00000185684
55218	ENSG00000166105
34199	ENSG00000206190
80806	ENSG00000139990
37977	ENSG00000076555
42271	ENSG00000211598
78556	ENSG00000244437
31626	ENSG00000211611
16597	ENSG00000211623
82882	ENSG00000211626
13450	ENSG00000211633
51700	ENSG00000211637
66235	ENSG00000211638
32452	ENSG00000211639
47383	ENSG00000211641
74598	ENSG00000211642
12278	ENSG00000211649
18317	ENSG00000211650
59292	ENSG00000211651
102461	ENSG00000211652
16395	ENSG00000211654
72022	ENSG00000211655
2121	ENSG00000211657
86342	ENSG00000211659
141113	ENSG00000211661
54707	ENSG00000211667
9197	ENSG00000211669
102274	ENSG00000211670
82791	ENSG00000211672
23947	ENSG00000211677
155435	ENSG00000211693
85503	ENSG00000211694
37427	ENSG00000211697
99317	ENSG00000211698
167792	ENSG00000211706
35226	ENSG00000211707
80644	ENSG00000211710
87371	ENSG00000211713
5145	ENSG00000211714
12568	ENSG00000211715
114374	ENSG00000211716
13085	ENSG00000211717
46088	ENSG00000211720
113115	ENSG00000211721
35191	ENSG00000253409
53010	ENSG00000211725
114729	ENSG00000253188
1614	ENSG00000211728
19990	ENSG00000253534
25969	ENSG00000253291
9390	ENSG00000211734
3940	ENSG00000237702
19806	ENSG00000229063
94538	ENSG00000211745
45512	ENSG00000211746
144280	ENSG00000211747
11954	ENSG00000211749
24260	ENSG00000211750
50573	ENSG00000255569
97400	ENSG00000211777
10547	ENSG00000211778
50757	ENSG00000211781
87715	ENSG00000211782
23682	ENSG00000211783
22161	ENSG00000211788
96560	ENSG00000211789
21230	ENSG00000211791
43096	ENSG00000211792
44073	ENSG00000211794
58777	ENSG00000211797
156753	ENSG00000211799
101944	ENSG00000211801
29782	ENSG00000211802
45890	ENSG00000211805
14693	ENSG00000211806
88210	ENSG00000211808
84713	ENSG00000211809
68753	ENSG00000211810
61046	ENSG00000211812
107563	ENSG00000211813
169322	ENSG00000211818
8371	ENSG00000211829
20365	ENSG00000256590
15728	ENSG00000211890
2810	ENSG00000211895
68788	ENSG00000211896
37648	ENSG00000211897
13621	ENSG00000211898
57785	ENSG00000211899
50053	ENSG00000211942
32901	ENSG00000211943
14565	ENSG00000211944
17703	ENSG00000211945
19771	ENSG00000211946
78798	ENSG00000211951
10323	ENSG00000211957
45254	ENSG00000211961
41433	ENSG00000211962
114823	ENSG00000211965
87472	ENSG00000211966
50779	ENSG00000211972
2421	ENSG00000211972
40658	ENSG00000274576
48866	ENSG00000131263
87180	ENSG00000212658
16604	ENSG00000180386
26877	ENSG00000180386
30612	ENSG00000212659
115726	ENSG00000189143
46062	ENSG00000267908
110345	ENSG00000126773
119592	ENSG00000070367
112302	ENSG00000205133
103392	ENSG00000067167
118978	ENSG00000152467
6810	ENSG00000186818
28712	ENSG00000171163
42242	ENSG00000104894
70640	ENSG00000078018
143942	ENSG00000138400
75362	ENSG00000089327
64279	ENSG00000089327
39856	ENSG00000155657
32121	ENSG00000152894
105660	ENSG00000186919
4956	ENSG00000177954
97023	ENSG00000241343
58450	ENSG00000117281
4104	ENSG00000092607
23076	ENSG00000188523
85288	ENSG00000132026
30748	ENSG00000135966
127515	ENSG00000095321
139404	ENSG00000137494
33938	ENSG00000115602
120941	ENSG00000091136
146819	ENSG00000135638
29750	ENSG00000145907
52264	ENSG00000140937
26517	ENSG00000080815
66681	ENSG00000171992
66113	ENSG00000164663
24342	ENSG00000127922
12204	ENSG00000125691
47614	ENSG00000169247
144327	ENSG00000101972
16464	ENSG00000140538
43208	ENSG00000198133
40987	ENSG00000170522
65798	ENSG00000196968
30669	ENSG00000166317
41656	ENSG00000108576
56907	ENSG00000107758
129365	ENSG00000171132
4021	ENSG00000094880
60021	ENSG00000217236
55836	ENSG00000131437
89500	ENSG00000182010
149386	ENSG00000182010
17011	ENSG00000196313
60418	ENSG00000158169
87661	ENSG00000079337
114405	ENSG00000168944
77096	ENSG00000064652
31068	ENSG00000139218
98197	ENSG00000064692
152741	ENSG00000184313
129995	ENSG00000177427
87892	ENSG00000139132
9360	ENSG00000108557
7901	ENSG00000133030
134644	ENSG00000164929
94050	ENSG00000011295
27755	ENSG00000187607
92777	ENSG00000109099
82351	ENSG00000124171
12963	ENSG00000114978
81746	ENSG00000154678
8590	ENSG00000137871
56066	ENSG00000160336
140316	ENSG00000164749
70577	ENSG00000280260
22616	ENSG00000185038
35964	ENSG00000185038
119581	ENSG00000152056
95694	ENSG00000174738
4119	ENSG00000100908
1560	ENSG00000126217
55801	ENSG00000126217
33750	ENSG00000218739
70191	ENSG00000146039
44155	ENSG00000214029
3330	ENSG00000184708
18649	ENSG00000160307
32917	ENSG00000187959
91876	ENSG00000078699
11084	ENSG00000168487
120302	ENSG00000160255
26753	ENSG00000214226
10181	ENSG00000214324
26157	ENSG00000115423
15947	ENSG00000150672
9969	ENSG00000167674
36169	ENSG00000278499
17869	ENSG00000101439
915	ENSG00000086730
91851	ENSG00000141644
106543	ENSG00000173276
12970	ENSG00000104728
78900	ENSG00000125844
53012	ENSG00000184029
2085	ENSG00000214787
35307	ENSG00000214787
35416	ENSG00000182670
69489	ENSG00000185515
20465	ENSG00000186496
94709	ENSG00000214866
22368	ENSG00000188162
100857	ENSG00000188162
89949	ENSG00000188162
108563	ENSG00000215018
26556	ENSG00000170242
118310	ENSG00000205531
89038	ENSG00000134490
57390	ENSG00000198736
30070	ENSG00000156265
22857	ENSG00000182798
28986	ENSG00000166265
91115	ENSG00000088387
34821	ENSG00000215474
10183	ENSG00000154654
120236	ENSG00000243440
112270	ENSG00000276070
70297	ENSG00000204060
5158	ENSG00000215906
98437	ENSG00000215912
59713	ENSG00000215912
70117	ENSG00000172059
105994	ENSG00000164587
10068	ENSG00000189350
69857	ENSG00000162804
65492	ENSG00000169429
116515	ENSG00000115841
14629	ENSG00000144115
113321	ENSG00000100353
39467	ENSG00000011454
20478	ENSG00000130638
36783	ENSG00000183891
105765	ENSG00000146205
68840	ENSG00000106392
25056	ENSG00000196588
35098	ENSG00000100028
162173	ENSG00000198792
14205	ENSG00000047936
1608	ENSG00000102384
6698	ENSG00000099985
63438	ENSG00000185686
23371	ENSG00000162994
30090	ENSG00000138050
1467	ENSG00000109846
7513	ENSG00000173209
18267	ENSG00000165699
127936	ENSG00000213923
83920	ENSG00000106346
41717	ENSG00000182621
136610	ENSG00000146670
16738	ENSG00000085760
25096	ENSG00000213626
55551	ENSG00000197632
47961	ENSG00000137710
97949	ENSG00000275763
90465	ENSG00000172348
149050	ENSG00000071575
82492	ENSG00000119630
21936	ENSG00000149131
113177	ENSG00000100142
40628	ENSG00000069020
99612	ENSG00000187045
12985	ENSG00000146122
135683	ENSG00000115239
9437	ENSG00000100246
50745	ENSG00000115977
45966	ENSG00000100263
54390	ENSG00000185686
45211	ENSG00000218739
137987	ENSG00000100218
111834	ENSG00000219438
8045	ENSG00000011105
77481	ENSG00000182150
144801	ENSG00000160223
63731	ENSG00000170419
51691	ENSG00000170419
40325	ENSG00000163050
71008	ENSG00000162959
113160	ENSG00000136709
102391	ENSG00000144468
55375	ENSG00000157999
92816	ENSG00000066248
80594	ENSG00000102547
76182	ENSG00000164904
61855	ENSG00000185414
68391	ENSG00000115641
97571	ENSG00000163535
80969	ENSG00000144278
67808	ENSG00000100987
144027	ENSG00000122574
1122	ENSG00000183281
50978	ENSG00000119041
38138	ENSG00000115364
64512	ENSG00000152056
77023	ENSG00000186973
7581	ENSG00000144535
53241	ENSG00000006625
109172	ENSG00000135917
15560	ENSG00000180336
18801	ENSG00000166762
89751	ENSG00000170035
14079	ENSG00000066032
22874	ENSG00000038532
87274	ENSG00000101448
62821	ENSG00000136193
83838	ENSG00000182263
44168	ENSG00000144231
32185	ENSG00000150722
127501	ENSG00000170379
155647	ENSG00000180347
121970	ENSG00000163166
39274	ENSG00000132330
130958	ENSG00000122591
107423	ENSG00000171227
45490	ENSG00000136546
48700	ENSG00000119865
54238	ENSG00000115363
50943	ENSG00000115919
36006	ENSG00000003393
728	ENSG00000118997
12279	ENSG00000143889
65777	ENSG00000126218
21944	ENSG00000115935
162813	ENSG00000142609
89068	ENSG00000205442
4498	ENSG00000163882
7303	ENSG00000152939
89313	ENSG00000099957
22914	ENSG00000185863
36302	ENSG00000063245
123784	ENSG00000107099
1094	ENSG00000177994
46442	ENSG00000162621
57496	ENSG00000226430
89622	ENSG00000171877
103296	ENSG00000243710
111878	ENSG00000170703
29314	ENSG00000118961
1926	ENSG00000196542
104630	ENSG00000136244
74503	ENSG00000143222
55866	ENSG00000088386
42772	ENSG00000174501
83102	ENSG00000127948
7835	ENSG00000104866
29057	ENSG00000211448
145764	ENSG00000232869
53450	ENSG00000169894
36671	ENSG00000187553
1601	ENSG00000224650
16732	ENSG00000271178
78825	ENSG00000164398
90806	ENSG00000215474
79515	ENSG00000122870
111338	ENSG00000280221
70473	ENSG00000233306
104645	ENSG00000249773
6660	ENSG00000168477
96729	ENSG00000228146
22173	ENSG00000243543
91189	ENSG00000196436
2443	ENSG00000196436
80073	ENSG00000185619
99109	ENSG00000173262
98844	ENSG00000229637
3109	ENSG00000225698
3160	ENSG00000138081
8586	ENSG00000268991
131227	ENSG00000268744
46478	ENSG00000215910
39646	ENSG00000130731
83007	ENSG00000188859
114571	ENSG00000073910
71983	ENSG00000135974
117198	ENSG00000169519
31533	ENSG00000117425
29095	ENSG00000151914
86091	ENSG00000164398
42448	ENSG00000215529
92820	ENSG00000138028
71261	ENSG00000116698
147433	ENSG00000204740
73749	ENSG00000136930
108423	ENSG00000100162
69003	ENSG00000215277
22864	ENSG00000081665
60994	ENSG00000100142
126509	ENSG00000099977
27840	ENSG00000173988
66444	ENSG00000205086
138030	ENSG00000233438
22653	ENSG00000251369
28350	ENSG00000148303
9402	ENSG00000148303
49305	ENSG00000238227
90567	ENSG00000144455
51614	ENSG00000143889
269	ENSG00000078269
37913	ENSG00000134324
54969	ENSG00000145819
11408	ENSG00000108448
114155	ENSG00000102794
35305	ENSG00000203733
16197	ENSG00000218819
11684	ENSG00000278685
48452	ENSG00000223648
44141	ENSG00000230099
50893	ENSG00000161133
5939	ENSG00000204740
134693	ENSG00000204740
43678	ENSG00000226660
127912	ENSG00000155980
65804	ENSG00000099250
25159	ENSG00000124227
5118	ENSG00000183696
9472	ENSG00000204120
13647	ENSG00000182329
54269	ENSG00000187609
37080	ENSG00000002016
2063	ENSG00000106829
120077	ENSG00000130226
52053	ENSG00000241566
43620	ENSG00000178917
38465	ENSG00000163746
18722	ENSG00000181378
99634	ENSG00000157873
85107	ENSG00000115541
116227	ENSG00000240747
133009	ENSG00000267426
128143	ENSG00000147133
44857	ENSG00000055070
85498	ENSG00000211772
119796	ENSG00000196739
30750	ENSG00000162620
61925	ENSG00000242580
64006	ENSG00000067082
73584	ENSG00000165669
95839	ENSG00000187753
37555	ENSG00000186329
75781	ENSG00000198198
71504	ENSG00000239819
64611	ENSG00000134899
94867	ENSG00000169193
23385	ENSG00000134287
146175	ENSG00000123552
104192	ENSG00000158816
14024	ENSG00000168385
115142	ENSG00000239571
71628	ENSG00000160563
2681	ENSG00000151778
104146	ENSG00000162819
34155	ENSG00000178404
5252	ENSG00000160209
95493	ENSG00000188938
94427	ENSG00000197451
59634	ENSG00000107863
67998	ENSG00000232112
13218	ENSG00000120742
120112	ENSG00000182150
22701	ENSG00000130024
99083	ENSG00000169894
43974	ENSG00000277734
93127	ENSG00000154721
31069	ENSG00000214193
147343	ENSG00000152292
70944	ENSG00000087460
133089	ENSG00000178752
51779	ENSG00000276070
51120	ENSG00000204220
94122	ENSG00000104970
54699	ENSG00000196511
65797	ENSG00000241351
53439	ENSG00000169894
82638	ENSG00000189164
86600	ENSG00000156860
80605	ENSG00000083544
26875	ENSG00000198105
16923	ENSG00000106686
2832	ENSG00000148200
32797	ENSG00000137269
44778	ENSG00000198482
5008	ENSG00000131044
68370	ENSG00000149346
125890	ENSG00000101911
121262	ENSG00000264813
9928	ENSG00000176896
69628	ENSG00000122565
96126	ENSG00000183337
24027	ENSG00000100083
19046	ENSG00000171262
37941	ENSG00000243264
110151	ENSG00000171858
13845	ENSG00000241244
25825	ENSG00000146966
91057	ENSG00000127914
100182	ENSG00000151778
75753	ENSG00000115687
17747	ENSG00000175029
26178	ENSG00000221926
64292	ENSG00000154175
55296	ENSG00000163586
70767	ENSG00000185842
49693	ENSG00000058673
60802	ENSG00000144120
45866	ENSG00000213145
73358	ENSG00000133114
38290	ENSG00000164830
57465	ENSG00000231292
90765	ENSG00000115084
56828	ENSG00000168906
132690	ENSG00000109332
120301	ENSG00000164056
11643	ENSG00000188981
7841	ENSG00000187695
74971	ENSG00000120314
40944	ENSG00000134824
70094	ENSG00000095539
18136	ENSG00000147526
62704	ENSG00000147454
77934	ENSG00000080823
62250	ENSG00000237693
133202	ENSG00000186106
47575	ENSG00000111879
60620	ENSG00000169436
23727	ENSG00000141279
59560	ENSG00000250571
100674	ENSG00000136574
80012	ENSG00000276557
91036	ENSG00000204941
15347	ENSG00000160255
23276	ENSG00000136997
122474	ENSG00000276819
11169	ENSG00000276405
71580	ENSG00000175899
36227	ENSG00000156006
97367	ENSG00000117054
2459	ENSG00000122971
111202	ENSG00000072778
82362	ENSG00000075239
59757	ENSG00000075239
21822	ENSG00000075239
46590	ENSG00000139567
94645	ENSG00000080815
79684	ENSG00000196839
31812	ENSG00000108823
63952	ENSG00000169252
2749	ENSG00000239900
134	ENSG00000038002
94524	ENSG00000162688
161062	ENSG00000135744
84271	ENSG00000172482
55355	ENSG00000148218
8131	ENSG00000158578
32504	ENSG00000101986
31350	ENSG00000149925
64436	ENSG00000136872
60483	ENSG00000136872
65310	ENSG00000116748
16435	ENSG00000116748
144738	ENSG00000029534
60767	ENSG00000134982
14577	ENSG00000118137
151583	ENSG00000118137
27284	ENSG00000110245
9937	ENSG00000130203
49482	ENSG00000026103
42967	ENSG00000026103
3971	ENSG00000026103
74284	ENSG00000169083
6449	ENSG00000118520
91131	ENSG00000118520
154488	ENSG00000157399
21755	ENSG00000108381
13284	ENSG00000130707
22887	ENSG00000130707
32769	ENSG00000149311
134064	ENSG00000149311
100160	ENSG00000165240
56372	ENSG00000165240
40544	ENSG00000165240
146262	ENSG00000123191
60530	ENSG00000126895
32103	ENSG00000114200
84131	ENSG00000083123
81731	ENSG00000083123
143108	ENSG00000197299
68449	ENSG00000139618
36309	ENSG00000169814
56256	ENSG00000010671
26181	ENSG00000010671
100608	ENSG00000149131
84020	ENSG00000149131
105046	ENSG00000149131
92671	ENSG00000166278
76778	ENSG00000125730
5914	ENSG00000125730
37040	ENSG00000039537
90938	ENSG00000021852
145023	ENSG00000104267
65554	ENSG00000081248
39439	ENSG00000160654
38930	ENSG00000102245
55942	ENSG00000147889
88940	ENSG00000087237
47208	ENSG00000108556
23038	ENSG00000049167
37656	ENSG00000188037
69328	ENSG00000184908
9003	ENSG00000198515
41447	ENSG00000108821
45710	ENSG00000164692
49428	ENSG00000168542
39161	ENSG00000081052
36801	ENSG00000130635
38182	ENSG00000114270
132905	ENSG00000105664
55857	ENSG00000080819
59620	ENSG00000101439
57322	ENSG00000160213
41275	ENSG00000051523
36087	ENSG00000148795
24316	ENSG00000138061
99560	ENSG00000138061
9246	ENSG00000134574
99007	ENSG00000134574
64520	ENSG00000091140
18336	ENSG00000188641
96346	ENSG00000155850
13875	ENSG00000124205
171274	ENSG00000102125
15706	ENSG00000102119
148194	ENSG00000106991
45323	ENSG00000166947
21665	ENSG00000143819
917	ENSG00000187266
43018	ENSG00000163161
55483	ENSG00000134899
36816	ENSG00000225830
8849	ENSG00000091831
115671	ENSG00000091831
19248	ENSG00000140374
121241	ENSG00000182197
118390	ENSG00000088926
7791	ENSG00000124491
98401	ENSG00000124491
32547	ENSG00000185010
139523	ENSG00000101981
25234	ENSG00000145384
155093	ENSG00000187741
8067	ENSG00000158169
19166	ENSG00000103876
55056	ENSG00000166147
89285	ENSG00000149534
61501	ENSG00000149534
76710	ENSG00000068078
87456	ENSG00000068078
123434	ENSG00000091483
64707	ENSG00000170820
137454	ENSG00000170820
17766	ENSG00000087086
7385	ENSG00000179163
77425	ENSG00000171124
56815	ENSG00000156413
72744	ENSG00000156413
136225	ENSG00000131482
47823	ENSG00000171298
106944	ENSG00000108479
34460	ENSG00000213930
6927	ENSG00000114480
41630	ENSG00000215644
108471	ENSG00000131979
67944	ENSG00000106633
64170	ENSG00000112964
45041	ENSG00000112964
58589	ENSG00000010310
23360	ENSG00000152661
65376	ENSG00000169562
25923	ENSG00000106571
47204	ENSG00000102393
49378	ENSG00000178445
35891	ENSG00000145888
92878	ENSG00000114349
18306	ENSG00000185245
31616	ENSG00000169704
108710	ENSG00000105220
84651	ENSG00000100983
34718	ENSG00000116062
123511	ENSG00000132518
33308	ENSG00000169919
132080	ENSG00000084754
4820	ENSG00000099937
59299	ENSG00000113924
53183	ENSG00000256269
48930	ENSG00000117305
35009	ENSG00000164690
3152	ENSG00000165704
13402	ENSG00000107521
86800	ENSG00000107521
40688	ENSG00000176387
36958	ENSG00000130948
139151	ENSG00000130948
25899	ENSG00000203859
76908	ENSG00000205649
3012	ENSG00000205403
6414	ENSG00000205403
38253	ENSG00000147168
40375	ENSG00000147168
169256	ENSG00000254647
84756	ENSG00000171105
77352	ENSG00000139515
32011	ENSG00000091409
5120	ENSG00000091409
96687	ENSG00000160255
106936	ENSG00000259207
129002	ENSG00000132470
78945	ENSG00000101384
95866	ENSG00000105639
36034	ENSG00000105639
126705	ENSG00000011201
29788	ENSG00000111262
37193	ENSG00000053918
75513	ENSG00000157404
117840	ENSG00000157404
28529	ENSG00000213398
13123	ENSG00000174697
133875	ENSG00000102683
120924	ENSG00000163069
27580	ENSG00000138039
141564	ENSG00000105486
6719	ENSG00000107798
67832	ENSG00000166035
29794	ENSG00000175445
105814	ENSG00000055118
50245	ENSG00000189221
100434	ENSG00000103313
110044	ENSG00000105976
21989	ENSG00000179583
88248	ENSG00000179583
101680	ENSG00000076242
17044	ENSG00000076242
21937	ENSG00000005381
34438	ENSG00000095002
20782	ENSG00000095002
5358	ENSG00000171100
10742	ENSG00000138823
137306	ENSG00000116984
70316	ENSG00000116984
88565	ENSG00000116984
8660	ENSG00000146085
22655	ENSG00000134571
156228	ENSG00000092054
148324	ENSG00000092054
18810	ENSG00000160808
122015	ENSG00000197535
87945	ENSG00000137474
64697	ENSG00000137474
27782	ENSG00000034971
83723	ENSG00000198951
30500	ENSG00000198951
78421	ENSG00000108784
111042	ENSG00000158517
7542	ENSG00000158517
49071	ENSG00000158517
43305	ENSG00000124479
39537	ENSG00000196712
75547	ENSG00000141458
89878	ENSG00000144061
116441	ENSG00000101850
60983	ENSG00000065154
91207	ENSG00000104044
13408	ENSG00000104044
2535	ENSG00000171759
81753	ENSG00000007372
50055	ENSG00000007372
151015	ENSG00000007372
62330	ENSG00000166228
131143	ENSG00000175198
103341	ENSG00000133256
18781	ENSG00000131828
16440	ENSG00000124299
80965	ENSG00000108733
66329	ENSG00000124587
43127	ENSG00000124587
49663	ENSG00000112357
18908	ENSG00000112357
27800	ENSG00000152556
69623	ENSG00000102144
122480	ENSG00000044446
36781	ENSG00000156873
23418	ENSG00000008710
39994	ENSG00000118762
92846	ENSG00000143627
138531	ENSG00000081277
144204	ENSG00000081277
59506	ENSG00000188257
94827	ENSG00000122194
108257	ENSG00000083444
27195	ENSG00000083444
1657	ENSG00000109099
38210	ENSG00000105854
7635	ENSG00000064835
42509	ENSG00000064601
12745	ENSG00000143224
33828	ENSG00000131238
100985	ENSG00000131238
48214	ENSG00000171867
75276	ENSG00000115718
128717	ENSG00000115718
61321	ENSG00000184500
24595	ENSG00000171862
14895	ENSG00000171862
13550	ENSG00000152266
80528	ENSG00000160801
139121	ENSG00000150787
50408	ENSG00000139197
23773	ENSG00000151552
82136	ENSG00000139687
37347	ENSG00000112619
29336	ENSG00000112077
120220	ENSG00000140522
78583	ENSG00000149489
97671	ENSG00000156313
85608	ENSG00000156313
108908	ENSG00000116745
19585	ENSG00000102104
54838	ENSG00000124788
86846	ENSG00000124788
134631	ENSG00000163635
32264	ENSG00000007314
77237	ENSG00000183873
1963	ENSG00000168447
22035	ENSG00000170624
51675	ENSG00000170624
25814	ENSG00000074803
66200	ENSG00000074803
16954	ENSG00000070915
19622	ENSG00000163581
28698	ENSG00000138079
81861	ENSG00000004939
18931	ENSG00000004939
67938	ENSG00000004939
28679	ENSG00000004939
24622	ENSG00000100170
13141	ENSG00000125398
79145	ENSG00000070182
89987	ENSG00000277893
38630	ENSG00000147465
15481	ENSG00000198691
16521	ENSG00000101846
128159	ENSG00000006071
22442	ENSG00000185339
144564	ENSG00000120708
55459	ENSG00000092295
98535	ENSG00000178726
21035	ENSG00000129991
11184	ENSG00000118194
42866	ENSG00000140416
37843	ENSG00000137364
13718	ENSG00000165699
22617	ENSG00000137561
34443	ENSG00000118271
8223	ENSG00000077498
21533	ENSG00000114491
130882	ENSG00000126088
150809	ENSG00000188690
19419	ENSG00000188690
55399	ENSG00000015285
11802	ENSG00000158125
8703	ENSG00000136936
23579	ENSG00000101871
112399	ENSG00000072210
59332	ENSG00000084674
16724	ENSG00000108578
45457	ENSG00000178537
33159	ENSG00000188419
59841	ENSG00000166340
89412	ENSG00000166340
69951	ENSG00000023839
51731	ENSG00000204262
19263	ENSG00000100368
41849	ENSG00000100368
53501	ENSG00000143387
30492	ENSG00000165168
14756	ENSG00000122877
77571	ENSG00000104884
65064	ENSG00000104884
31775	ENSG00000151348
3594	ENSG00000160211
85926	ENSG00000117308
140724	ENSG00000170266
36894	ENSG00000196743
56983	ENSG00000196743
62885	ENSG00000048545
17321	ENSG00000010704
72588	ENSG00000159267
94433	ENSG00000113905
38585	ENSG00000108786
29883	ENSG00000133835
83175	ENSG00000121351
58757	ENSG00000027697
37488	ENSG00000134460
156578	ENSG00000134460
1450	ENSG00000077238
18969	ENSG00000005961
4501	ENSG00000197993
20389	ENSG00000128422
10698	ENSG00000172867
9840	ENSG00000186081
41563	ENSG00000198910
42001	ENSG00000196569
35664	ENSG00000203782
107059	ENSG00000119681
56458	ENSG00000151224
102439	ENSG00000007168
92097	ENSG00000007168
77141	ENSG00000110921
11387	ENSG00000111245
32038	ENSG00000116701
29172	ENSG00000204386
78359	ENSG00000074181
97964	ENSG00000083720
91390	ENSG00000158006
87258	ENSG00000158006
147378	ENSG00000175426
26644	ENSG00000132915
15338	ENSG00000091137
66484	ENSG00000261371
74264	ENSG00000261371
66060	ENSG00000102174
80944	ENSG00000005421
137023	ENSG00000143801
27785	ENSG00000143390
155074	ENSG00000143390
128723	ENSG00000007908
52243	ENSG00000007908
7502	ENSG00000125255
56098	ENSG00000105641
66447	ENSG00000142168
72036	ENSG00000139531
14467	ENSG00000275410
8957	ENSG00000120156
17925	ENSG00000090534
24318	ENSG00000090534
1655	ENSG00000138376
14141	ENSG00000127980
983	ENSG00000122691
102478	ENSG00000122691
145888	ENSG00000169297
38414	ENSG00000106992
80513	ENSG00000163631
13763	ENSG00000162551
20930	ENSG00000104899
140424	ENSG00000145020
38779	ENSG00000145020
24489	ENSG00000110244
12835	ENSG00000142192
26286	ENSG00000198931
89327	ENSG00000167580
83747	ENSG00000100299
81238	ENSG00000117601
21276	ENSG00000085224
57606	ENSG00000085224
12402	ENSG00000085224
11281	ENSG00000101200
88350	ENSG00000173369
79420	ENSG00000001626
27261	ENSG00000123500
82214	ENSG00000065618
5367	ENSG00000244752
110877	ENSG00000160882
55345	ENSG00000179142
6671	ENSG00000140465
107170	ENSG00000231852
103171	ENSG00000049540
17657	ENSG00000049540
143811	ENSG00000121053
66500	ENSG00000104313
8638	ENSG00000104313
72702	ENSG00000126218
75431	ENSG00000131187
93499	ENSG00000165140
13781	ENSG00000171560
75517	ENSG00000171557
60103	ENSG00000131808
64543	ENSG00000141012
52879	ENSG00000168621
86434	ENSG00000168621
38802	ENSG00000259384
111214	ENSG00000188536
51679	ENSG00000188536
89361	ENSG00000244734
60120	ENSG00000223609
25964	ENSG00000049860
20449	ENSG00000106031
12713	ENSG00000128714
156702	ENSG00000178394
45294	ENSG00000187486
43893	ENSG00000186847
60028	ENSG00000130164
11981	ENSG00000104774
66553	ENSG00000185231
39555	ENSG00000158887
43454	ENSG00000158887
118436	ENSG00000036473
16474	ENSG00000114054
23690	ENSG00000064933
52442	ENSG00000122512
58756	ENSG00000175097
73245	ENSG00000143839
109924	ENSG00000133111
107850	ENSG00000196218
41828	ENSG00000130561
49470	ENSG00000168878
33056	ENSG00000166311
160385	ENSG00000204267
20122	ENSG00000135100
119415	ENSG00000141510
49586	ENSG00000141510
80628	ENSG00000103197
73761	ENSG00000134200
49910	ENSG00000107165
148388	ENSG00000107165
29804	ENSG00000134086
12611	ENSG00000110799
53500	ENSG00000165392
9719	ENSG00000105392
35473	ENSG00000077279
10905	ENSG00000157131
102696	ENSG00000160712
87390	ENSG00000132693
19109	ENSG00000132693
69630	ENSG00000203747
86113	ENSG00000136634
27395	ENSG00000196352
12234	ENSG00000115008
33613	ENSG00000125538
25414	ENSG00000018280
31664	ENSG00000018280
24244	ENSG00000160791
99196	ENSG00000145321
35253	ENSG00000169429
120542	ENSG00000109471
19736	ENSG00000112936
47776	ENSG00000164399
37552	ENSG00000113520
16870	ENSG00000145839
129320	ENSG00000232810
43489	ENSG00000226979
23164	ENSG00000146678
75126	ENSG00000115457
65506	ENSG00000115461
75304	ENSG00000136244
24081	ENSG00000106366
69924	ENSG00000164867
44936	ENSG00000188379
85367	ENSG00000176919
73178	ENSG00000176919
78076	ENSG00000229314
116876	ENSG00000228278
39200	ENSG00000107562
15087	ENSG00000026508
89566	ENSG00000110169
11170	ENSG00000242689
62658	ENSG00000010610
52462	ENSG00000110911
33446	ENSG00000110911
34774	ENSG00000017427
12140	ENSG00000017427
99564	ENSG00000111537
2347	ENSG00000089250
77984	ENSG00000089250
83942	ENSG00000102468
93849	ENSG00000168398
[truncated: 40,544 more rows]
